# Supplementary material for: Design, Synthesis and Biological Evaluation of Lophanic Acid Derivatives as Antifungal and Antibacterial Agents
Source: MDPI journal article supplement (doi:10.3390/molecules27206836), 2022-10-12
Supplement: s1 [file s1]

## Supplementary material

# *Design, Synthesis and Biological Evaluation of Lophanic acid derivatives as Antifungal Agents and Antibacterial Agents*

Xiang Yu <sup>1,†</sup>, Xun Song <sup>2,3,†</sup>, Yi Zhang <sup>1,†</sup>, Yemeng Yang <sup>3,†</sup>, Jianghai Ye <sup>1</sup>, Yahua Liu <sup>1</sup>, Lutai Pan <sup>1,\*</sup> and Hongjie Zhang <sup>3,\*</sup>

<sup>1</sup>The Key Laboratory of Miao Medicine of Guizhou Province, Guizhou University of Traditional Chinese Medicine, Guiyang 550025, China;

<sup>2</sup>College of Pharmacy, Shenzhen Technology University, Shenzhen 518118, People's Republic of China

<sup>3</sup>School of Chinese Medicine, Hong Kong Baptist University, Hong Kong, People's Republic of China.

<sup>†</sup>These authors contributed equally to this work.

\*Corresponding Author: Lutai Pan, Email: ltpan@sina.cn;  
Hongjie Zhang, Email: zhanghj@hkbu.edu.hk

## Contents

**Figure S1.**  $^1\text{H}$  NMR spectrum of the compound **3a**.

**Figure S2.**  $^{13}\text{C}$  NMR spectrum of the compound **3a**.

**Figure S3.** HRMS spectrum of the compound **3a**.

**Figure S4.**  $^1\text{H}$  NMR spectrum of the compound **3b**.

**Figure S5.**  $^{13}\text{C}$  NMR spectrum of the compound **3b**.

**Figure S6.** HRMS spectrum of the compound **3b**.

**Figure S7.**  $^1\text{H}$  NMR spectrum of the compound **3c**.

**Figure S8.**  $^{13}\text{C}$  NMR spectrum of the compound **3c**.

**Figure S9.** HRMS spectrum of the compound **3c**.

**Figure S10.**  $^1\text{H}$  NMR spectrum of the compound **3d**.

**Figure S11.**  $^{13}\text{C}$  NMR spectrum of the compound **3d**.

**Figure S12.** HRMS spectrum of the compound **3d**.

**Figure S13.**  $^1\text{H}$  NMR spectrum of the compound **3e**.

**Figure S14.**  $^{13}\text{C}$  NMR spectrum of the compound **3e**.

**Figure S15.** HRMS spectrum of the compound **3e**.

**Figure S16.**  $^1\text{H}$  NMR spectrum of the compound **3f**.

**Figure S17.**  $^{13}\text{C}$  NMR spectrum of the compound **3f**.

**Figure S18.** HRMS spectrum of the compound **3f**.

**Figure S19.**  $^1\text{H}$  NMR spectrum of the compound **3g**.

**Figure S20.**  $^{13}\text{C}$  NMR spectrum of the compound **3g**.

**Figure S21.** HRMS spectrum of the compound **3g**.

**Figure S22.**  $^1\text{H}$  NMR spectrum of the compound **3h**.

**Figure S23.**  $^{13}\text{C}$  NMR spectrum of the compound **3h**.

**Figure S24.** HRMS spectrum of the compound **3h**.

**Figure S25.**  $^1\text{H}$  NMR spectrum of the compound **3i**.

**Figure S26.**  $^{13}\text{C}$  NMR spectrum of the compound **3i**.

**Figure S27.** HRMS spectrum of the compound **3i**.

**Figure S28.**  $^1\text{H}$  NMR spectrum of the compound **3j**.

**Figure S29.**  $^{13}\text{C}$  NMR spectrum of the compound **3j**.

**Figure S30.** HRMS spectrum of the compound **3j**.

**Figure S31.**  $^1\text{H}$  NMR spectrum of the compound **3k**.

**Figure S32.**  $^{13}\text{C}$  NMR spectrum of the compound **3k**.

**Figure S33.** HRMS spectrum of the compound **3k**.

**Figure S34.**  $^1\text{H}$  NMR spectrum of the compound **3l**.

**Figure S35.**  $^{13}\text{C}$  NMR spectrum of the compound **3l**.

**Figure S36.** HRMS spectrum of the compound **3l**.

**Figure S37.**  $^1\text{H}$  NMR spectrum of the compound **3m**.

**Figure S38.**  $^{13}\text{C}$  NMR spectrum of the compound **3m**.

**Figure S39.** HRMS spectrum of the compound **3m**.

**Figure S40.**  $^1\text{H}$  NMR spectrum of the compound **3n**.

**Figure S41.**  $^{13}\text{C}$  NMR spectrum of the compound **3n**.

**Figure S42.** HRMS spectrum of the compound **3n**.

**Figure S43.**  $^1\text{H}$  NMR spectrum of the compound **4**.

**Figure S44.**  $^{13}\text{C}$  NMR spectrum of the compound **4**.

**Figure S45.** HRMS spectrum of the compound **4**.

**Figure S46.**  $^1\text{H}$  NMR spectrum of the compound **5a**.

**Figure S47.**  $^{13}\text{C}$  NMR spectrum of the compound **5a**.

**Figure S48.** HRMS spectrum of the compound **5a**.

**Figure S49.**  $^1\text{H}$  NMR spectrum of the compound **5b**.

**Figure S50.**  $^{13}\text{C}$  NMR spectrum of the compound **5b**.

**Figure S51.** HRMS spectrum of the compound **5b**.

**Figure S52.**  $^1\text{H}$  NMR spectrum of the compound **5c**.

**Figure S53.**  $^{13}\text{C}$  NMR spectrum of the compound **5c**.

**Figure S54.** HRMS spectrum of the compound **5c**.

**Figure S55.**  $^1\text{H}$  NMR spectrum of the compound **5d**.

**Figure S56.**  $^{13}\text{C}$  NMR spectrum of the compound **5d**.

**Figure S57.** HRMS spectrum of the compound **5d**.

**Figure S58.**  $^1\text{H}$  NMR spectrum of the compound **5e**.

**Figure S59.**  $^{13}\text{C}$  NMR spectrum of the compound **5e**.

**Figure S60.** HRMS spectrum of the compound **5e**.

**Figure S61.**  $^1\text{H}$  NMR spectrum of the compound **5f**.

**Figure S62.**  $^{13}\text{C}$  NMR spectrum of the compound **5f**.

**Figure S63.** HRMS spectrum of the compound **5f**.

**Figure S64.**  $^1\text{H}$  NMR spectrum of the compound **5g**.

**Figure S65.**  $^{13}\text{C}$  NMR spectrum of the compound **5g**.

**Figure S66.** HRMS spectrum of the compound **5g**.

**Figure S67.**  $^1\text{H}$  NMR spectrum of the compound **5h**.

**Figure S68.**  $^{13}\text{C}$  NMR spectrum of the compound **5h**.

**Figure S69.** HRMS spectrum of the compound **5h**.

**Figure S70.**  $^1\text{H}$  NMR spectrum of the compound **6a**.

**Figure S71.**  $^{13}\text{C}$  NMR spectrum of the compound **6a**.

**Figure S72.** HRMS spectrum of the compound **6a**.

**Figure S73.**  $^1\text{H}$  NMR spectrum of the compound **6b**.

**Figure S74.**  $^{13}\text{C}$  NMR spectrum of the compound **6b**.

**Figure S75.** HRMS spectrum of the compound **6b**.

**Figure S76.**  $^1\text{H}$  NMR spectrum of the compound **6c**.

**Figure S77.**  $^{13}\text{C}$  NMR spectrum of the compound **6c**.

**Figure S78.** HRMS spectrum of the compound **6c**.

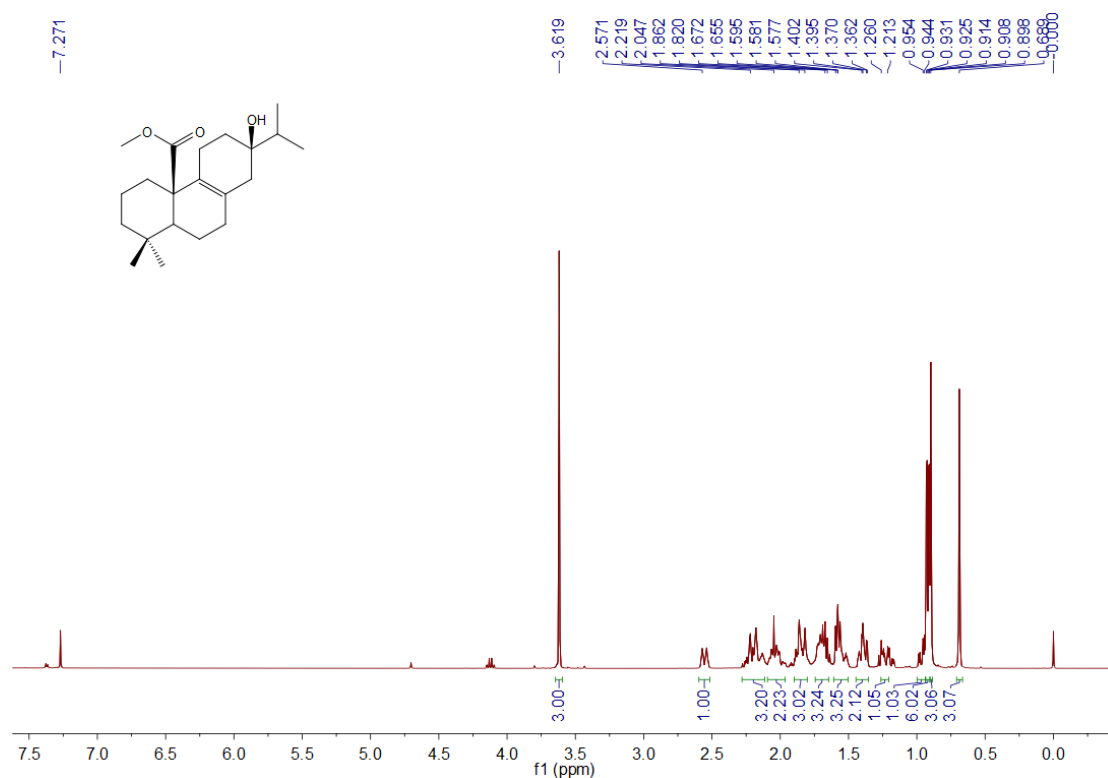

Figure S1. <sup>1</sup>H NMR spectrum of the compound 3a.

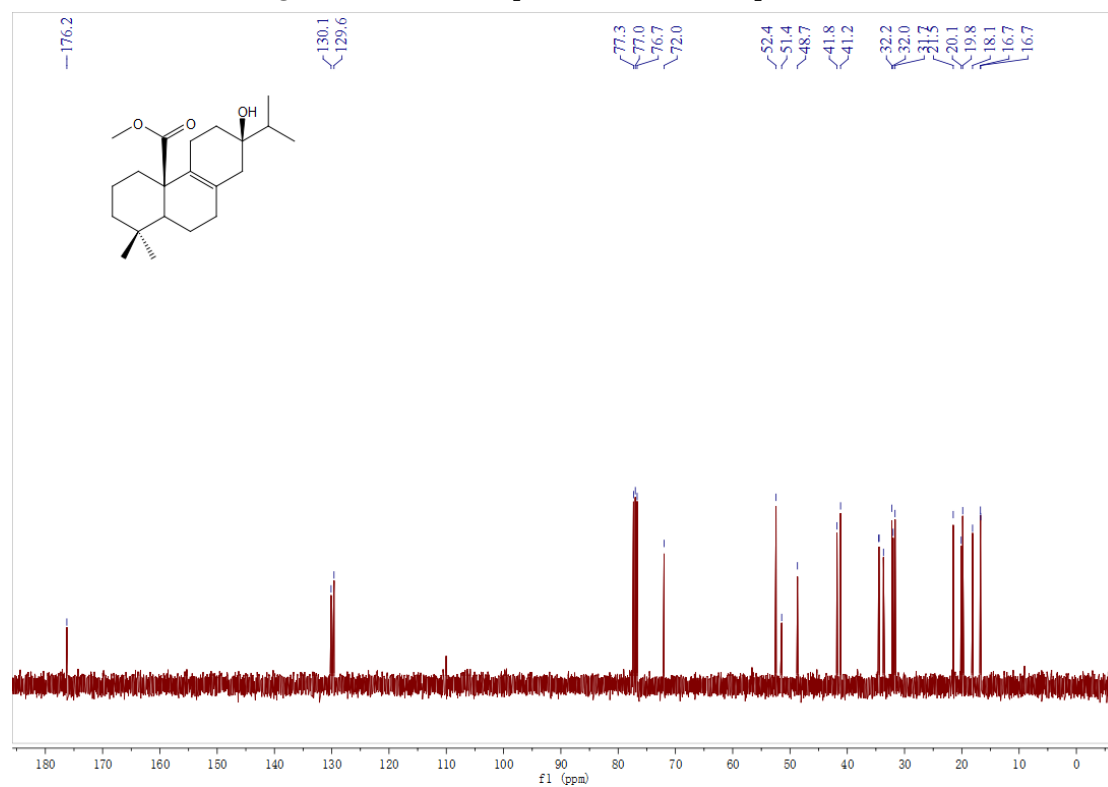

Figure S2. <sup>13</sup>C NMR spectrum of the compound 3a.

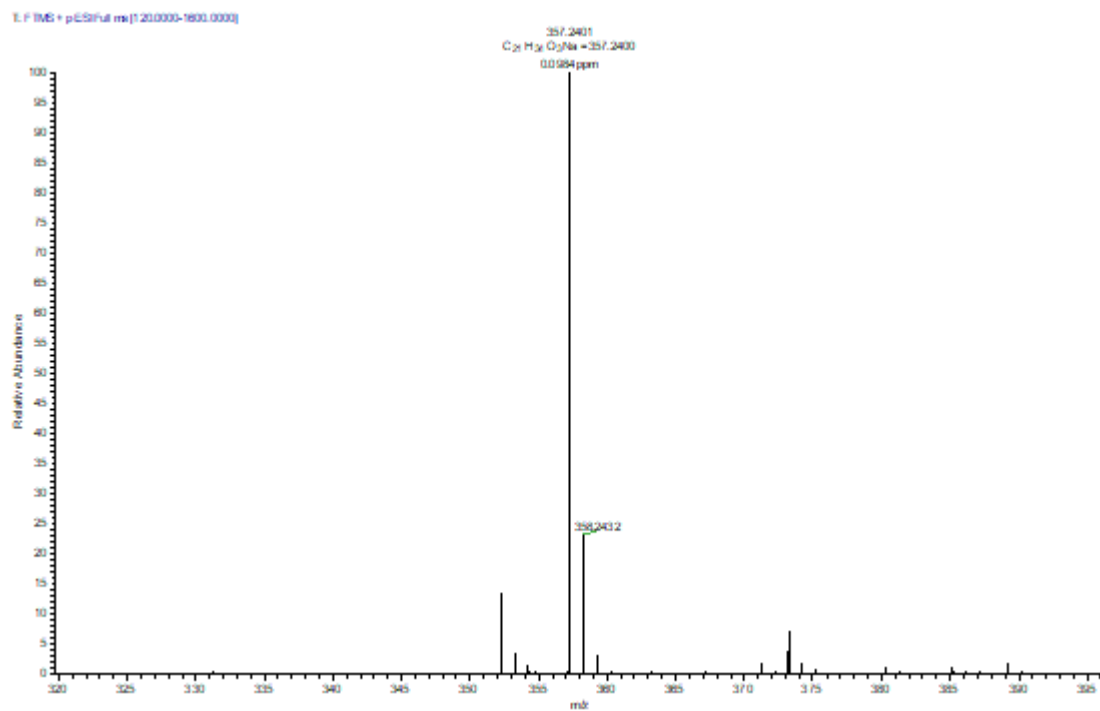

Figure S3. HRMS spectrum of the compound 3a.

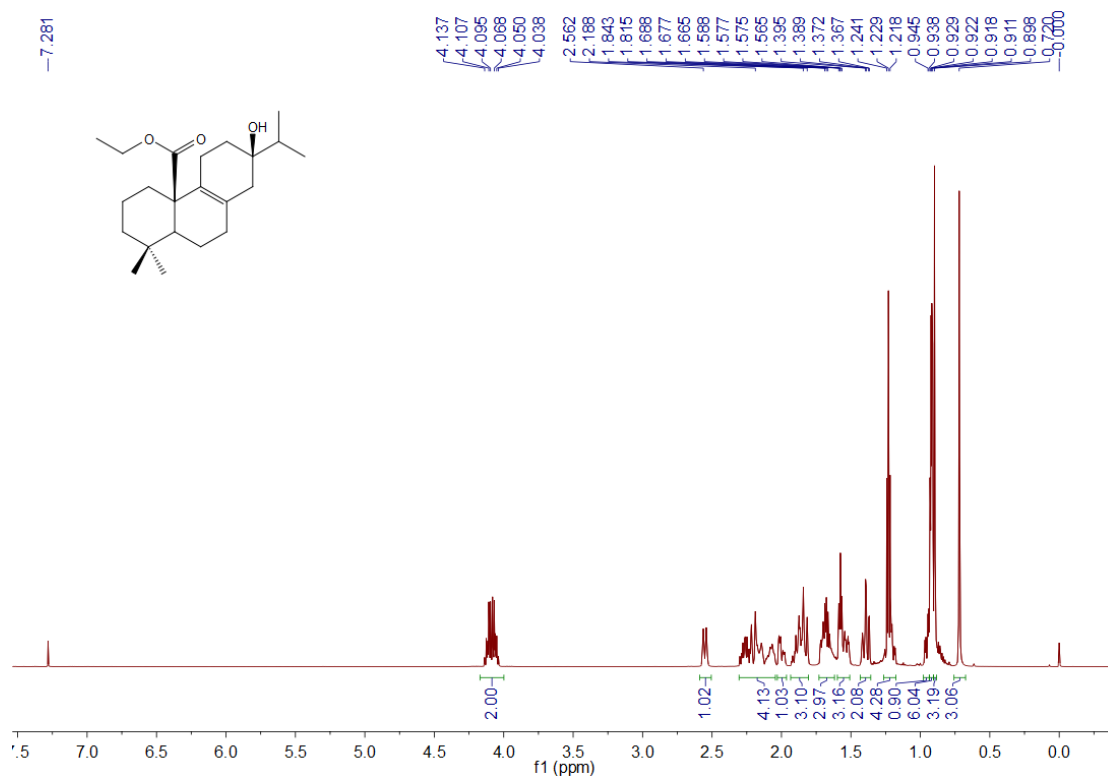

Figure S4. <sup>1</sup>H NMR spectrum of the compound 3b.

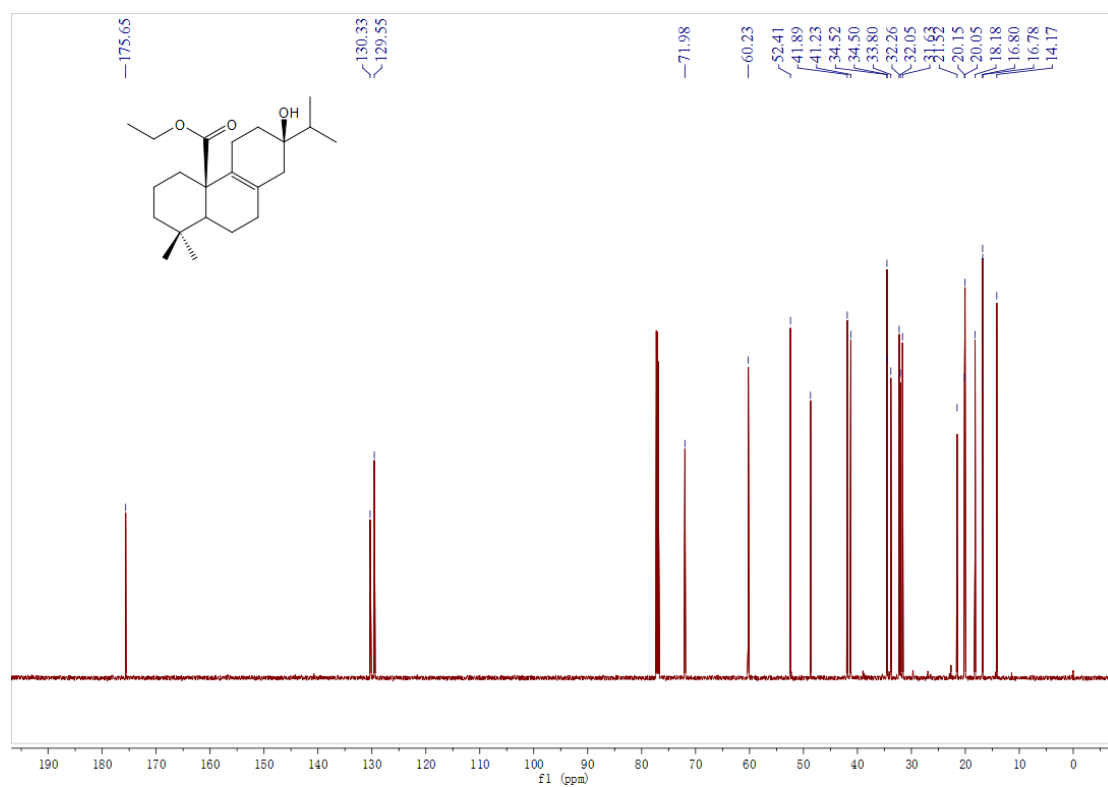

**Figure S5.** <sup>13</sup>C NMR spectrum of the compound **3b**.

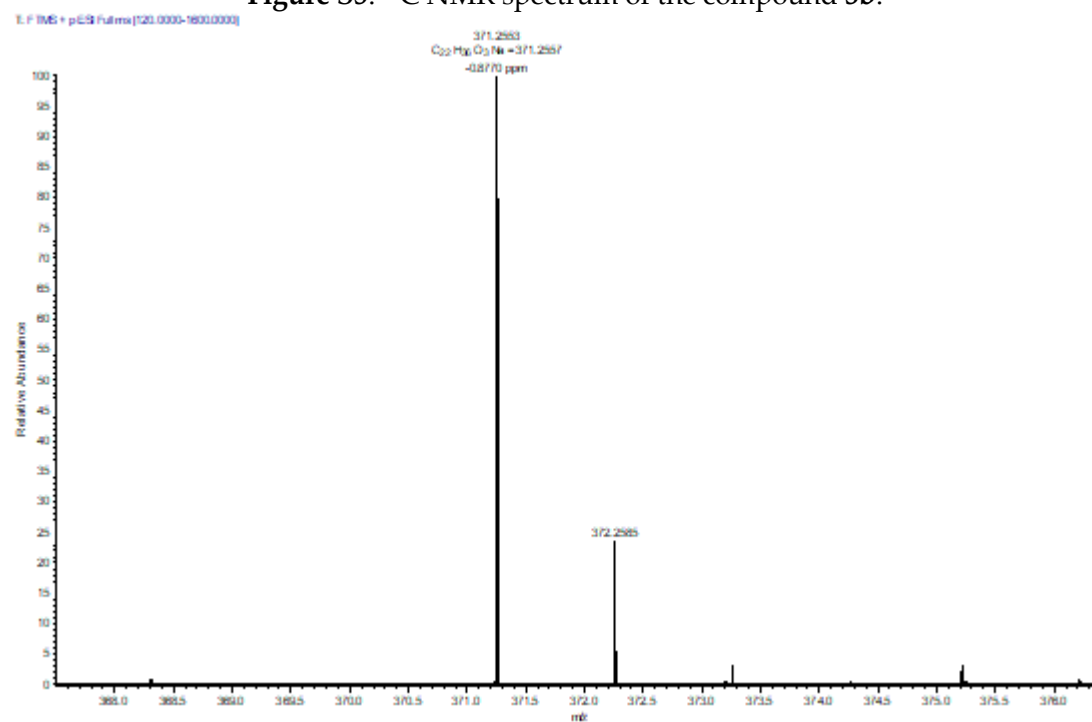

**Figure S6.** HRMS spectrum of the compound **3b**.



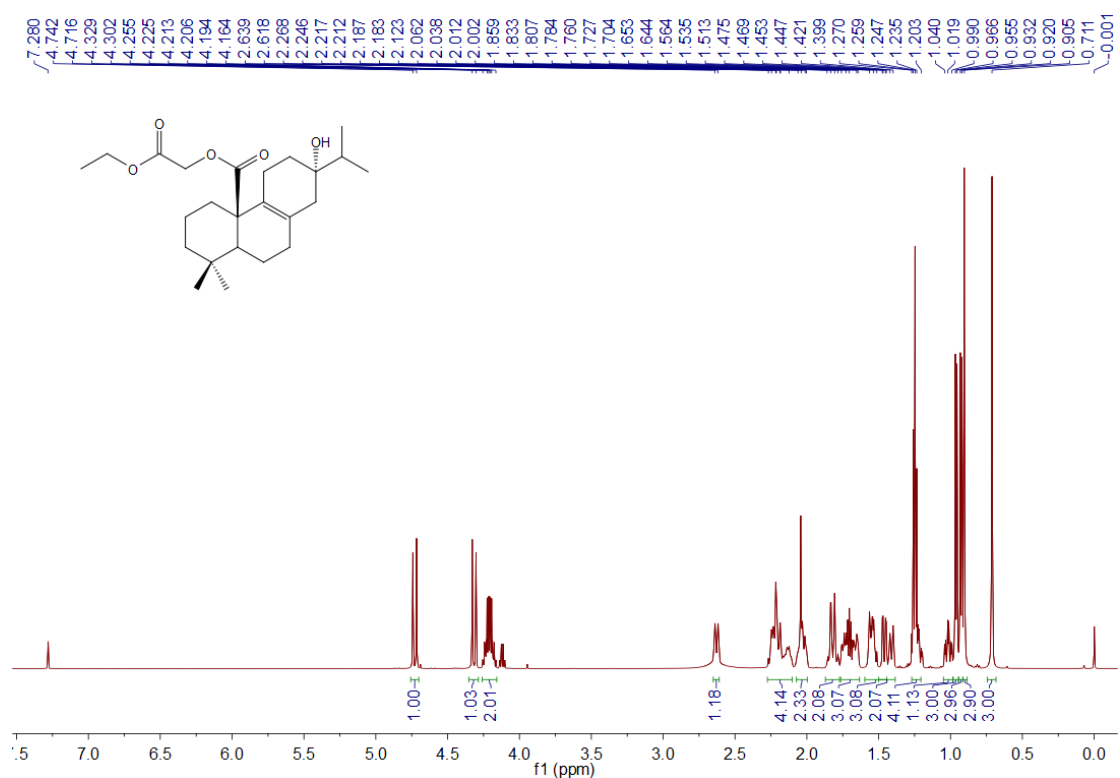

Figure S7. <sup>1</sup>H NMR spectrum of the compound 3c.

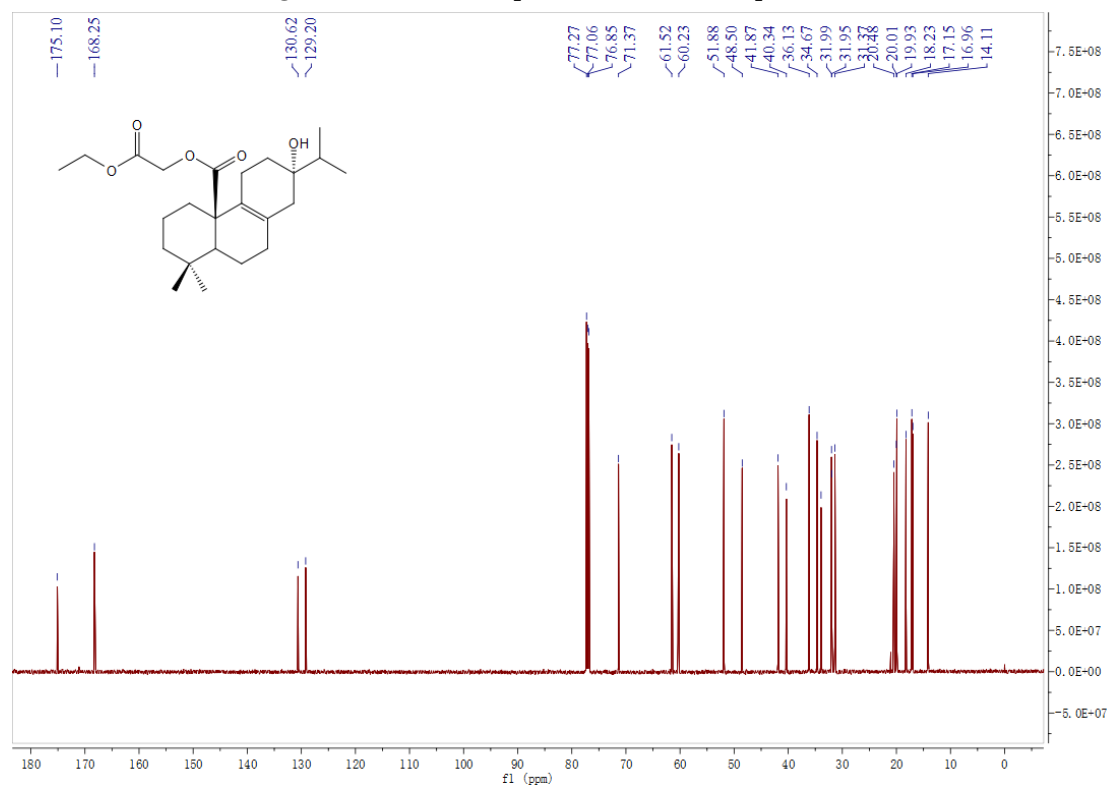

Figure S8. <sup>13</sup>C NMR spectrum of the compound 3c.

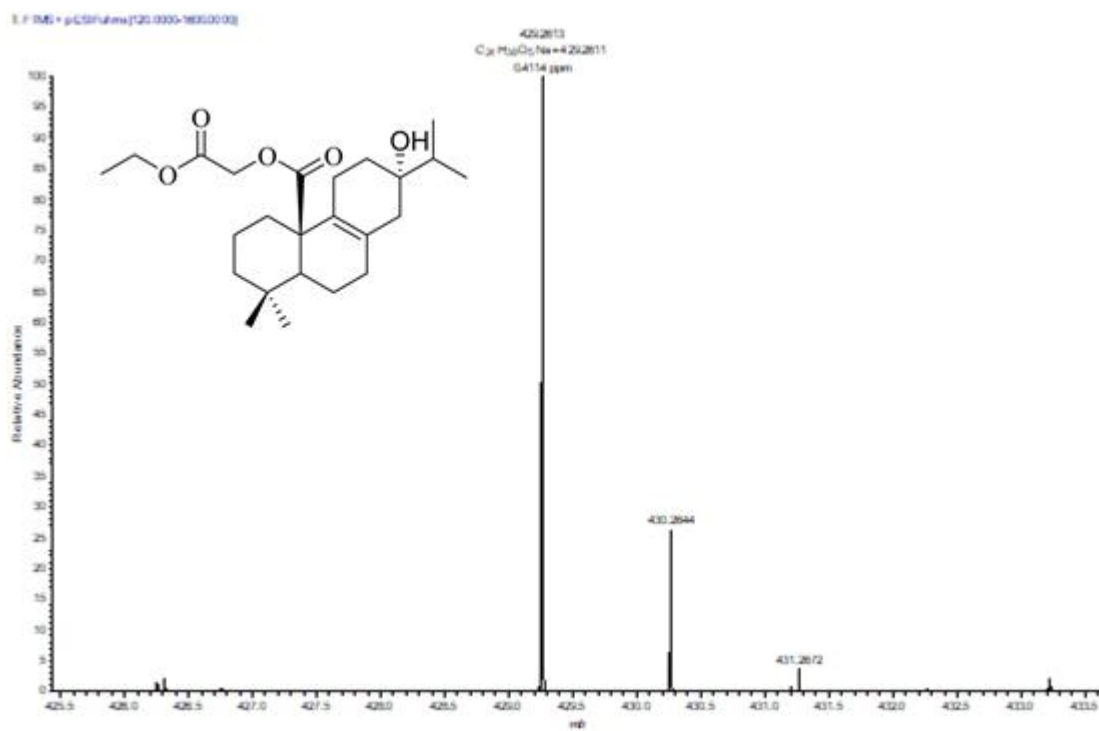

Figure S9. HRMS spectrum of the compound 3c.

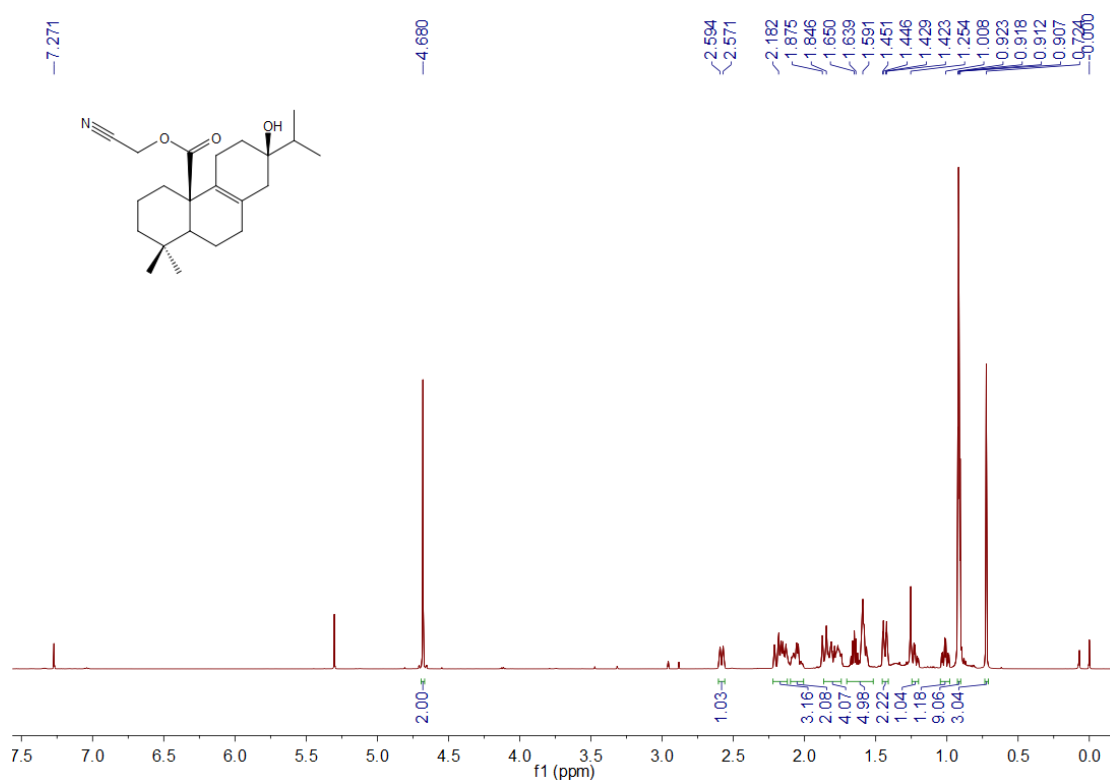

Figure S10. <sup>1</sup>H NMR spectrum of the compound 3d.

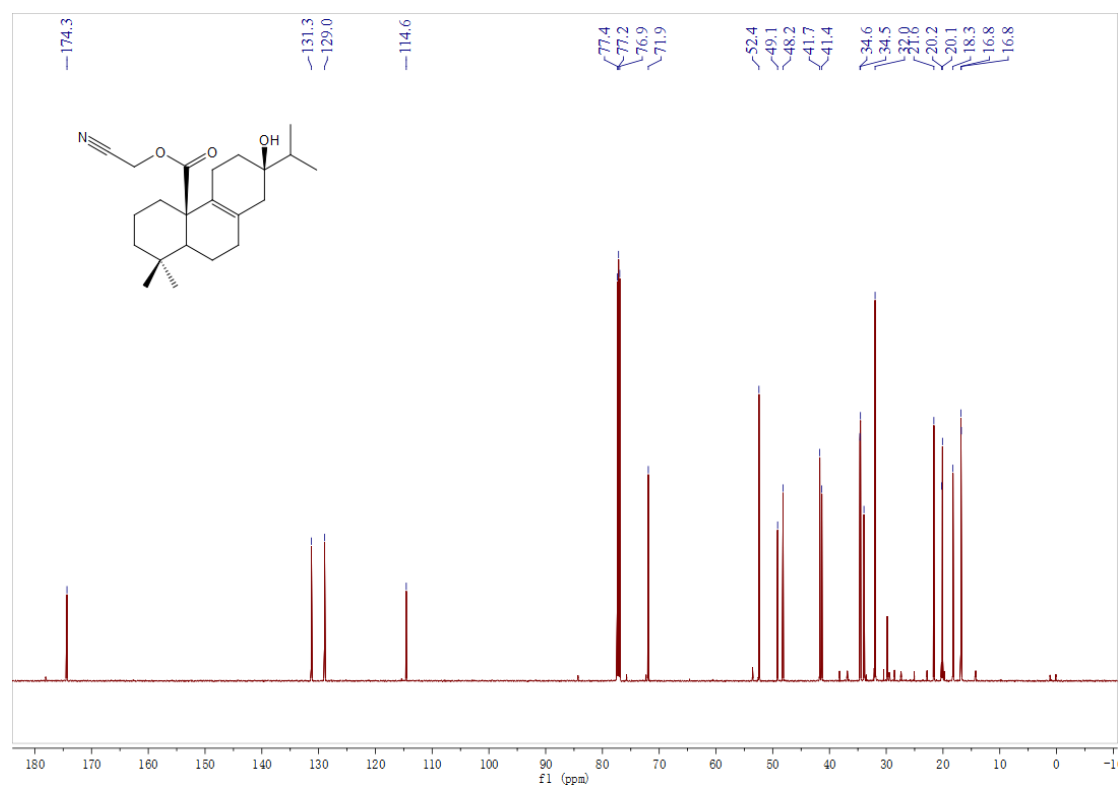

Figure S11.  $^{13}\text{C}$  NMR spectrum of the compound 3d.

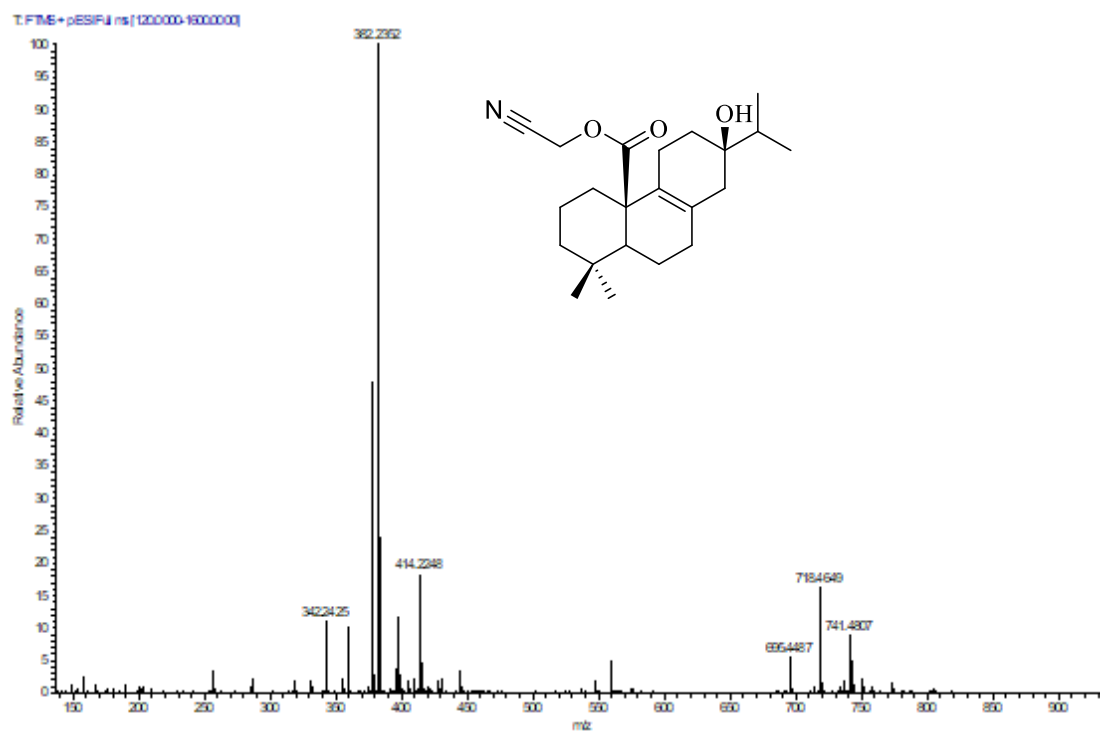

Figure S12. HRMS spectrum of the compound 3d.

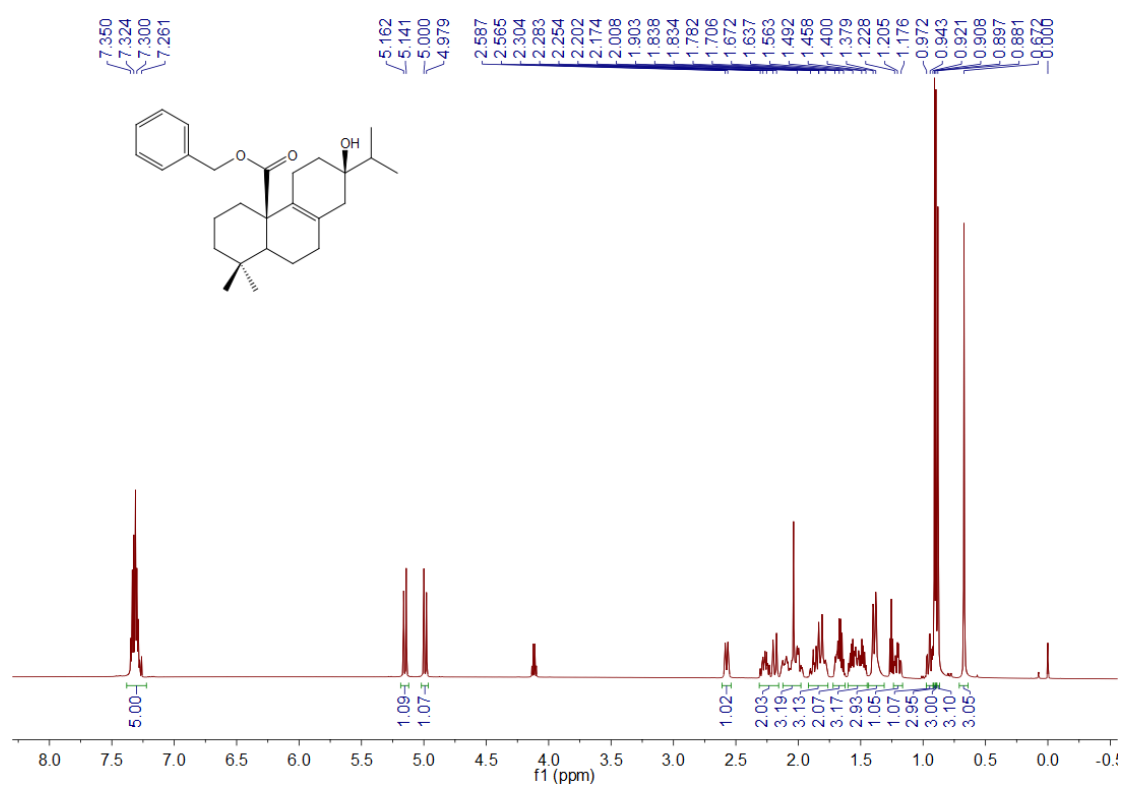

Figure S13. <sup>1</sup>H NMR spectrum of the compound 3e.

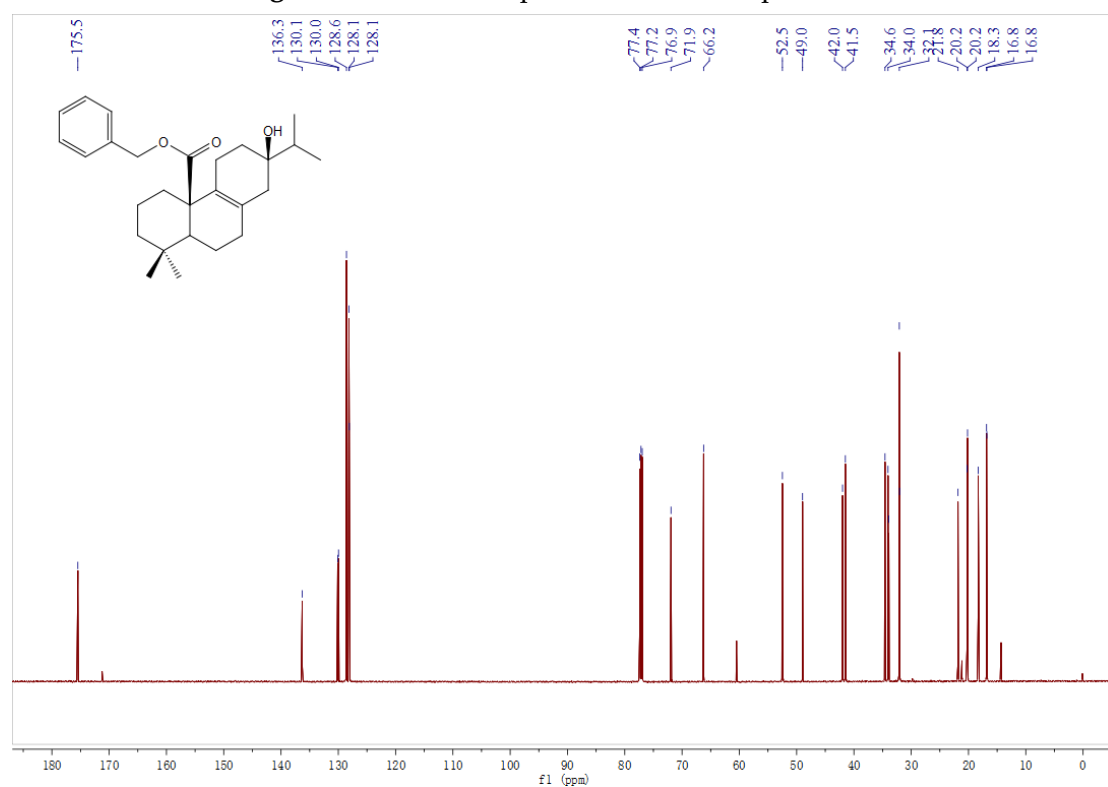

Figure S14. <sup>13</sup>C NMR spectrum of the compound 3e.

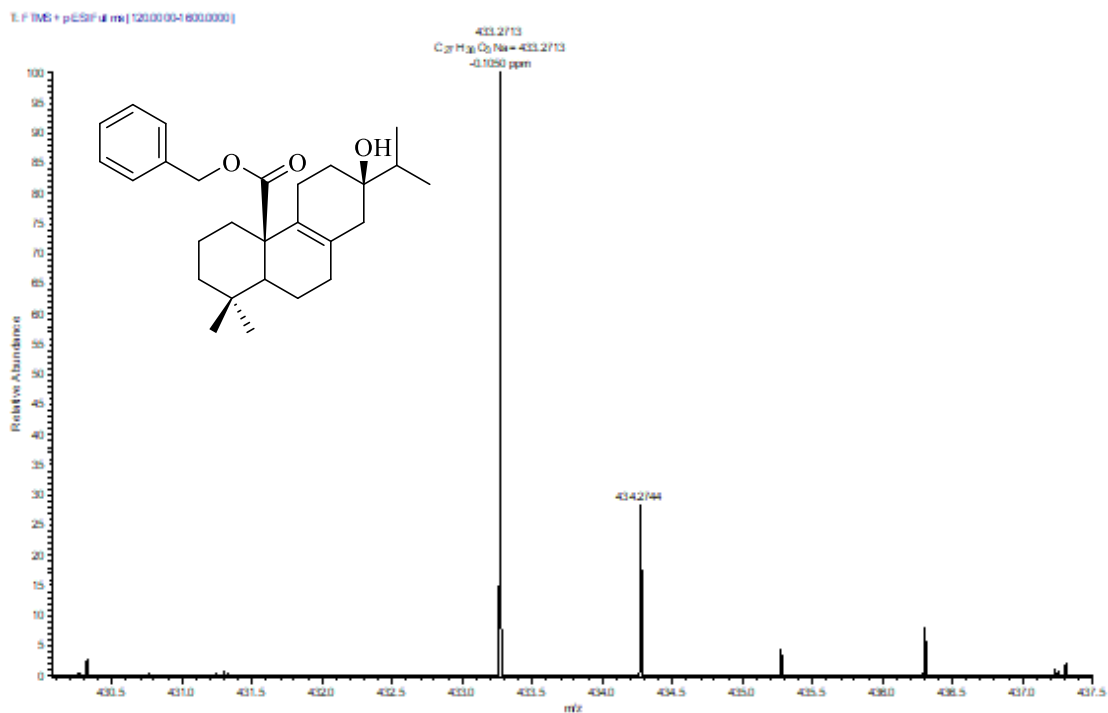

Figure S15. HRMS spectrum of the compound 3e.

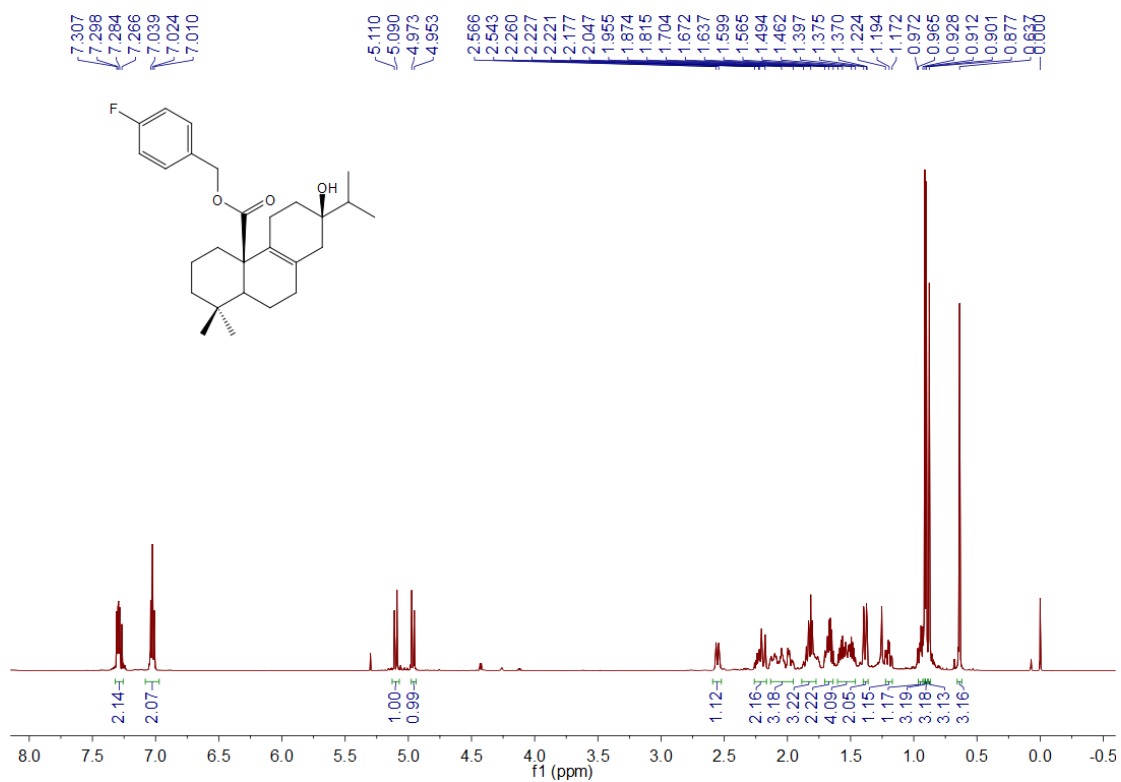

Figure S16. <sup>1</sup>H NMR spectrum of the compound 3f.

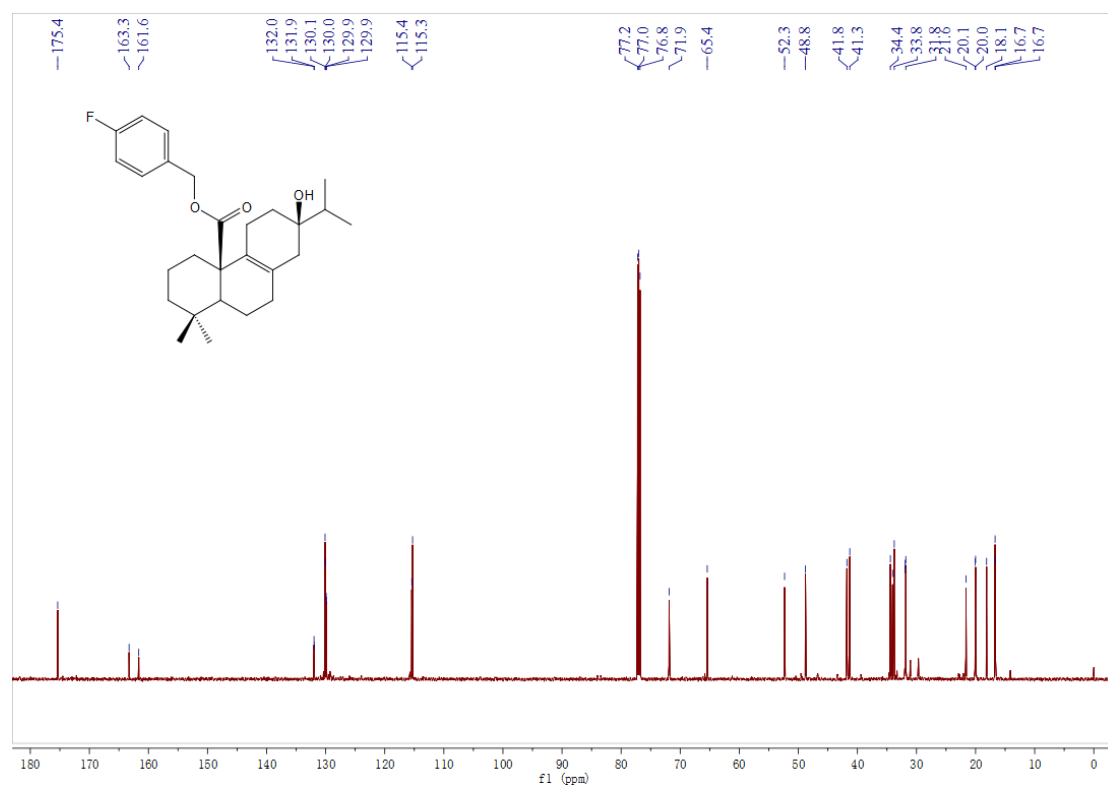

Figure S17. <sup>13</sup>C NMR spectrum of the compound 3f.

Y:58 #39 RT: 0.17 AV: 1 NL: 6.72E7  
T: FTMS + p ESI Full ms [120.0000-1600.0000]

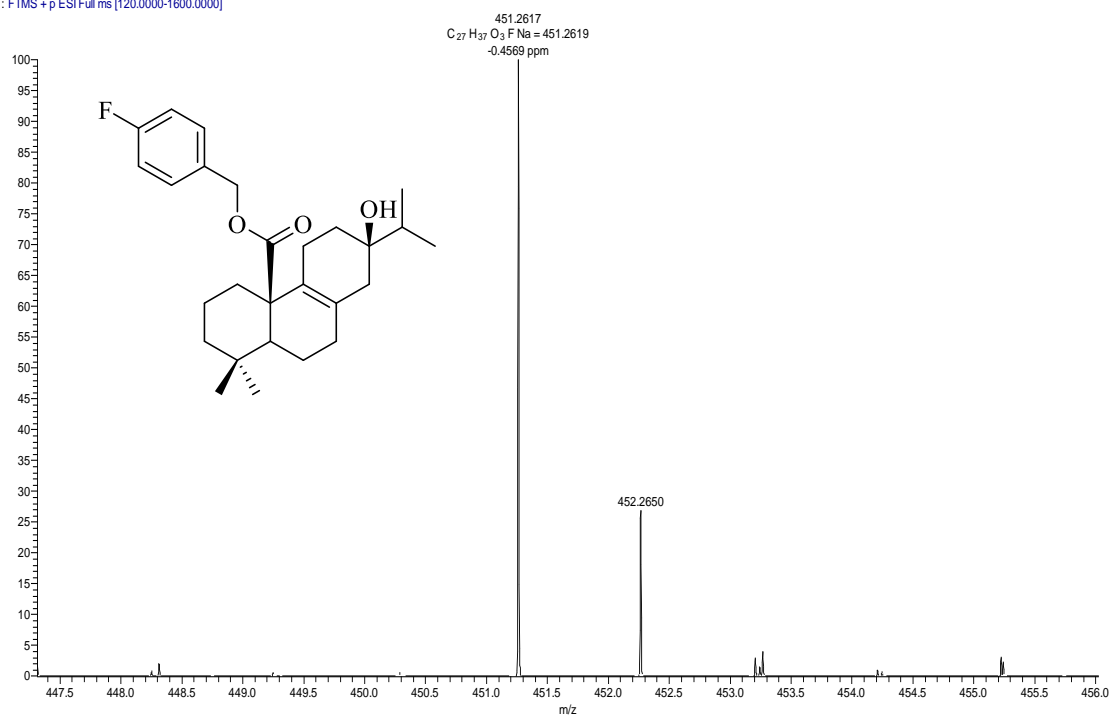

Figure S18. HRMS spectrum of the compound 3f.

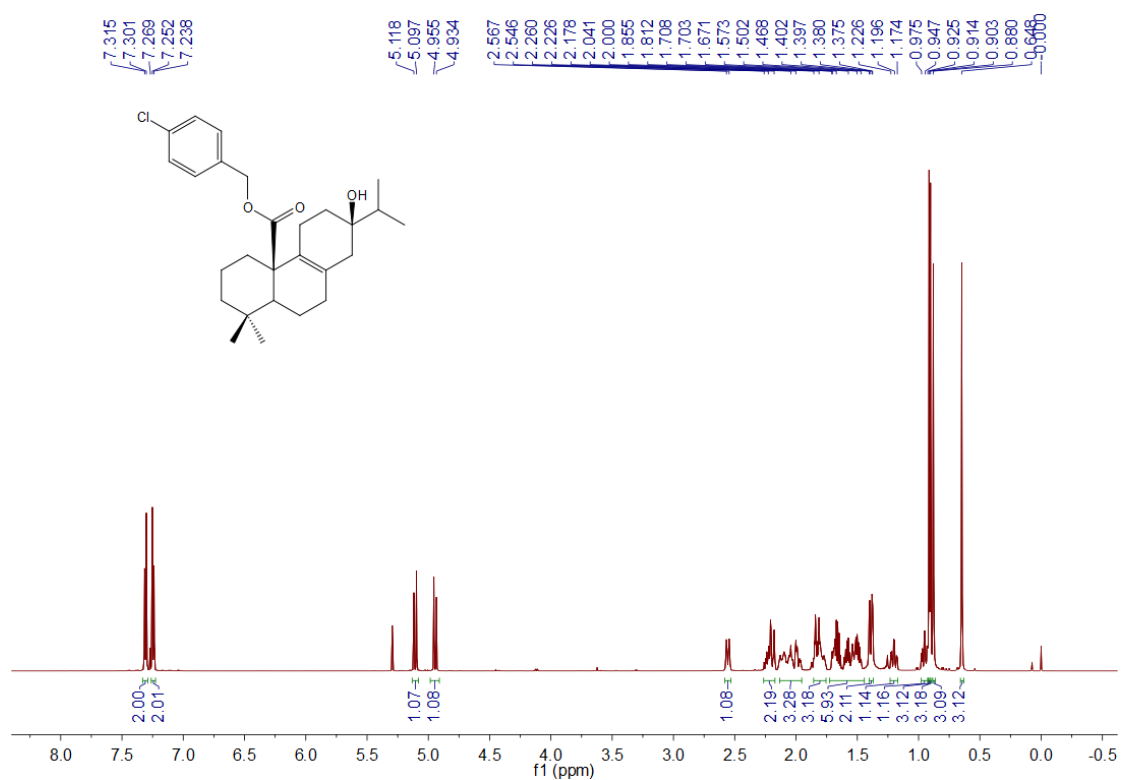

Figure S19. <sup>1</sup>H NMR spectrum of the compound 3g.

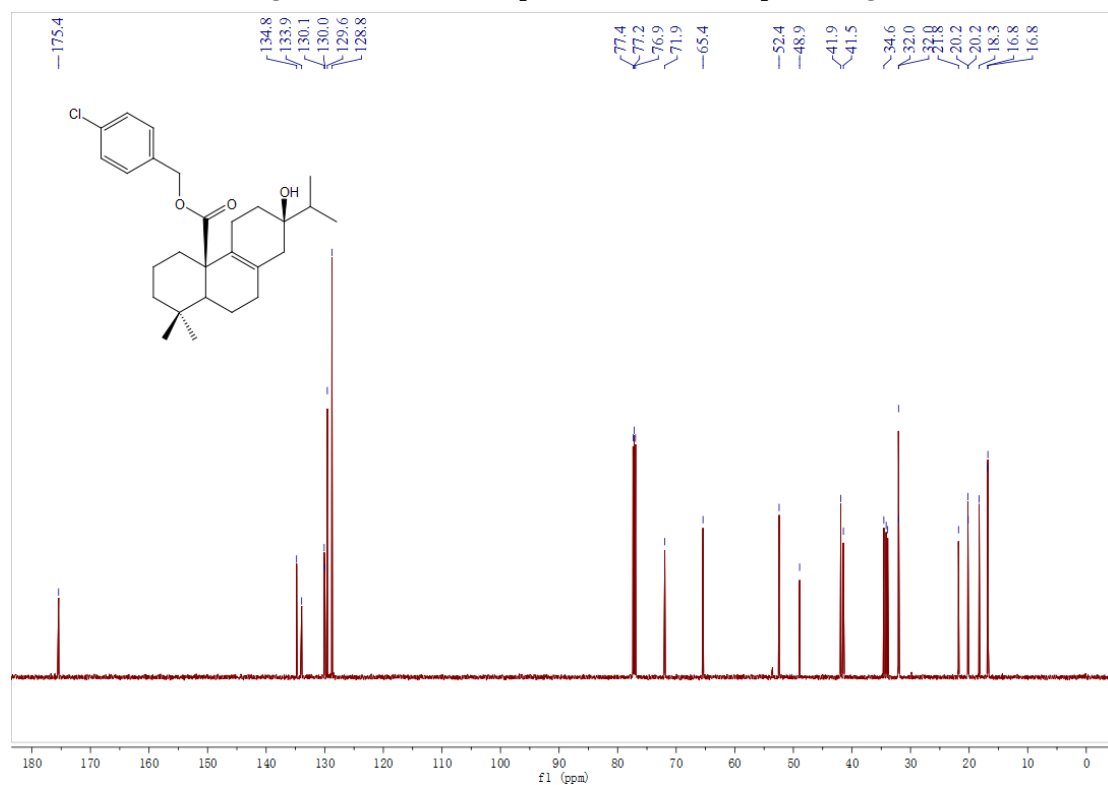

Figure S20. <sup>13</sup>C NMR spectrum of the compound 3g.

Y59 #40 RT: 0.18 AV: 1 NL: 6.77E8  
T: FTMS + p ESI Full ms [120.0000-1600.0000]

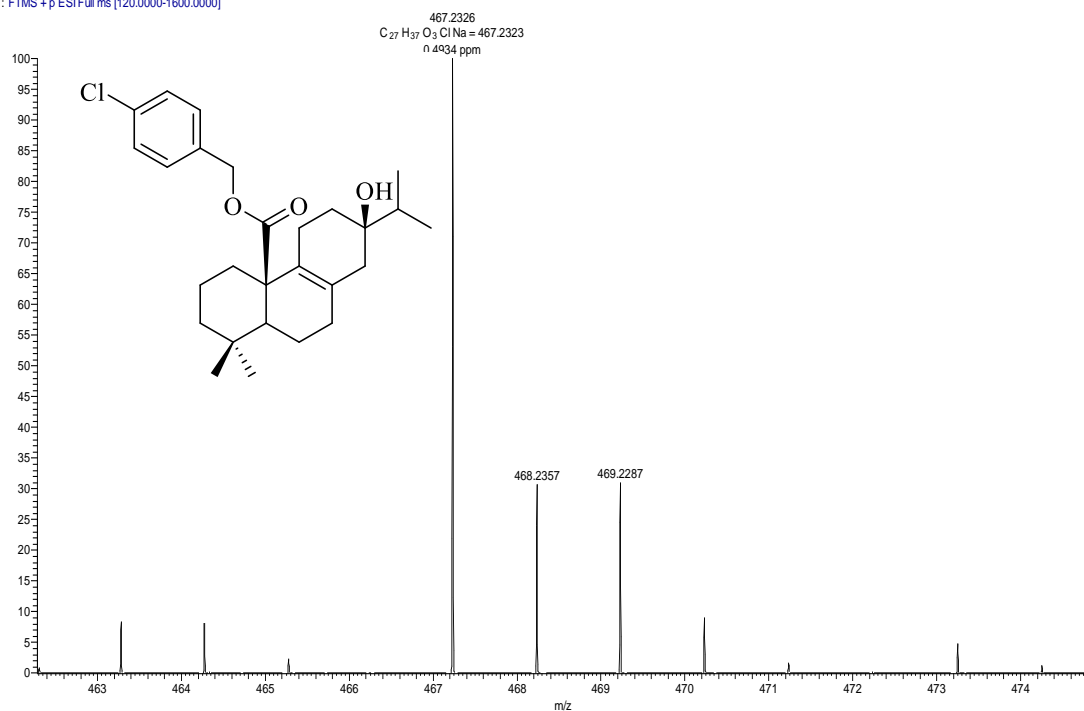

Figure S21. HRMS spectrum of the compound 3g.

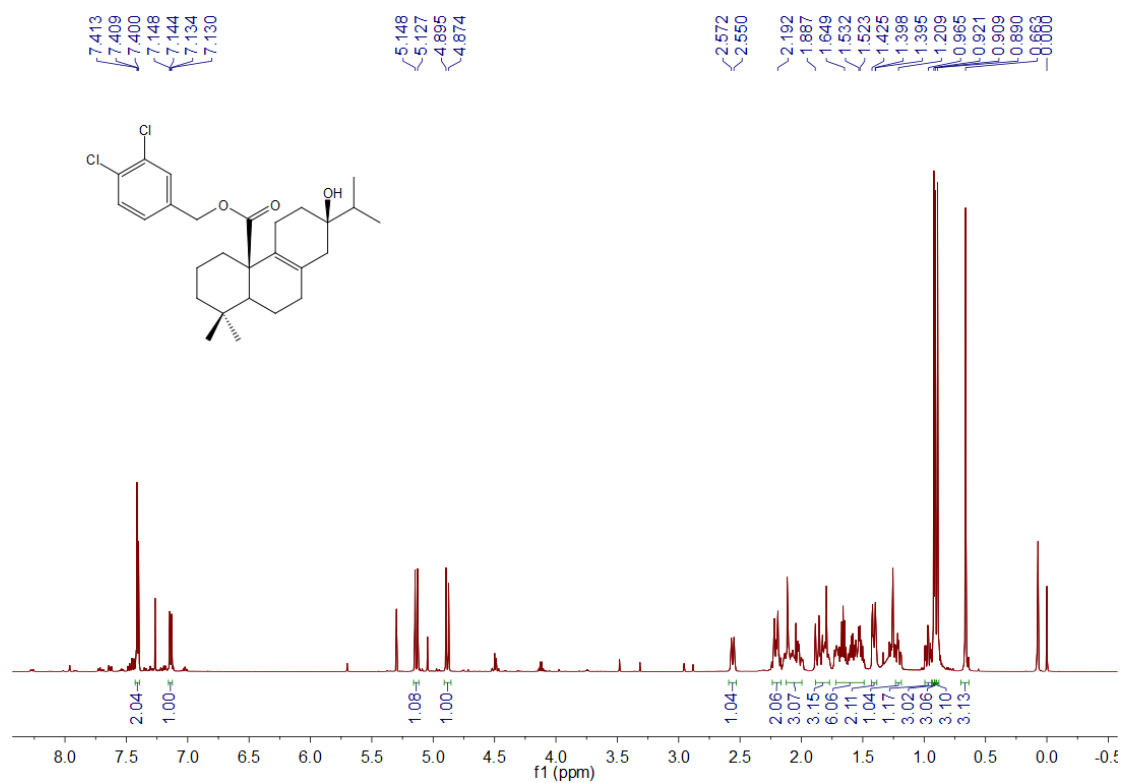

Figure S22. <sup>1</sup>H NMR spectrum of the compound 3h.



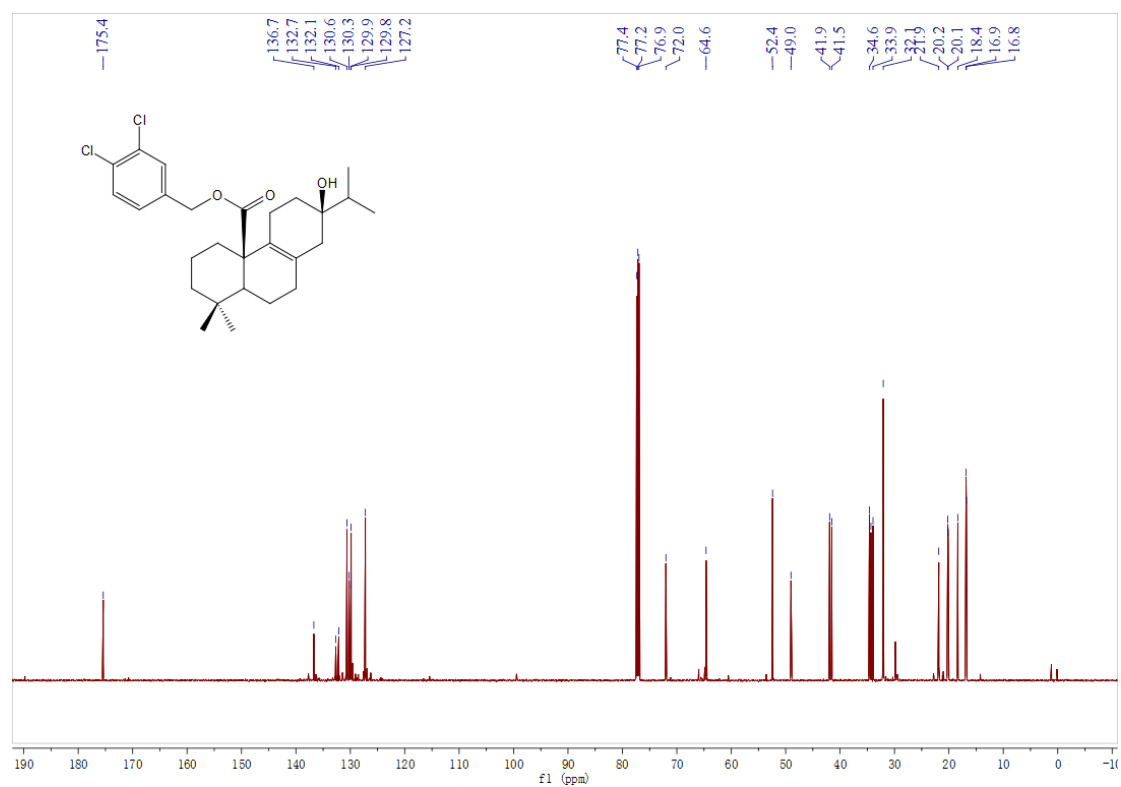

**Figure S23.** <sup>13</sup>C NMR spectrum of the compound 3h.

Y-93 #42 RT: 0.18 AV: 1 NL: 9.50E7  
T: FTMS + p ESI Full ms [120.0000-1600.0000]

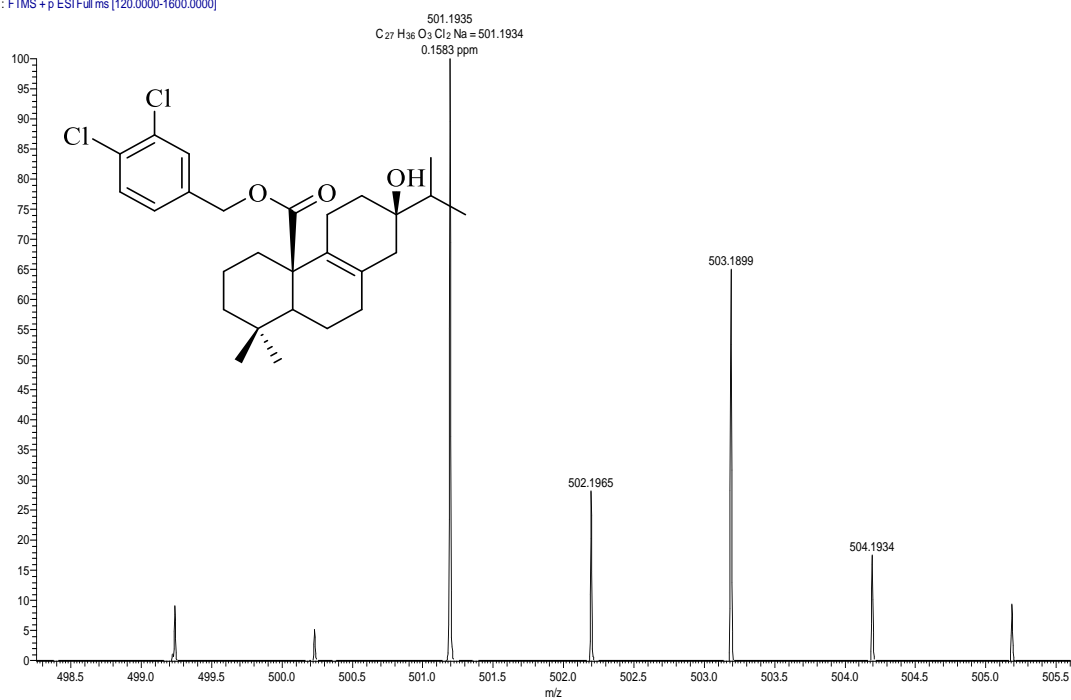

**Figure S24.** HRMS spectrum of the compound 3h.

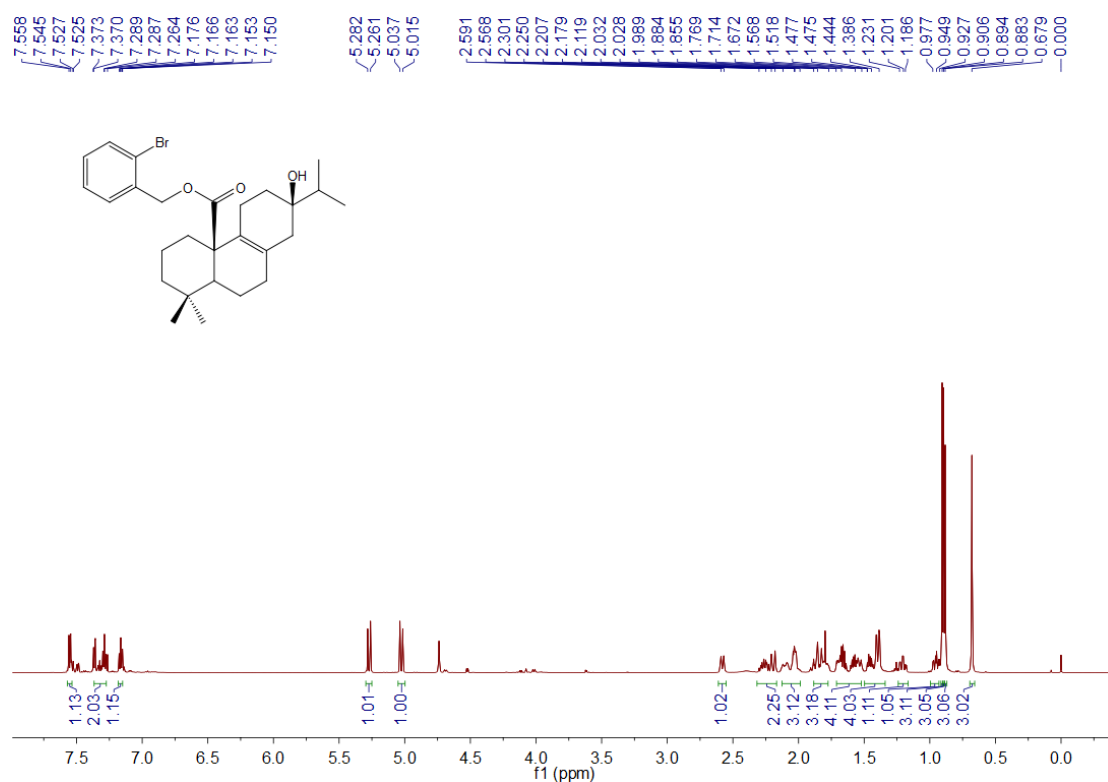

Figure S25. <sup>1</sup>H NMR spectrum of the compound **3i**.

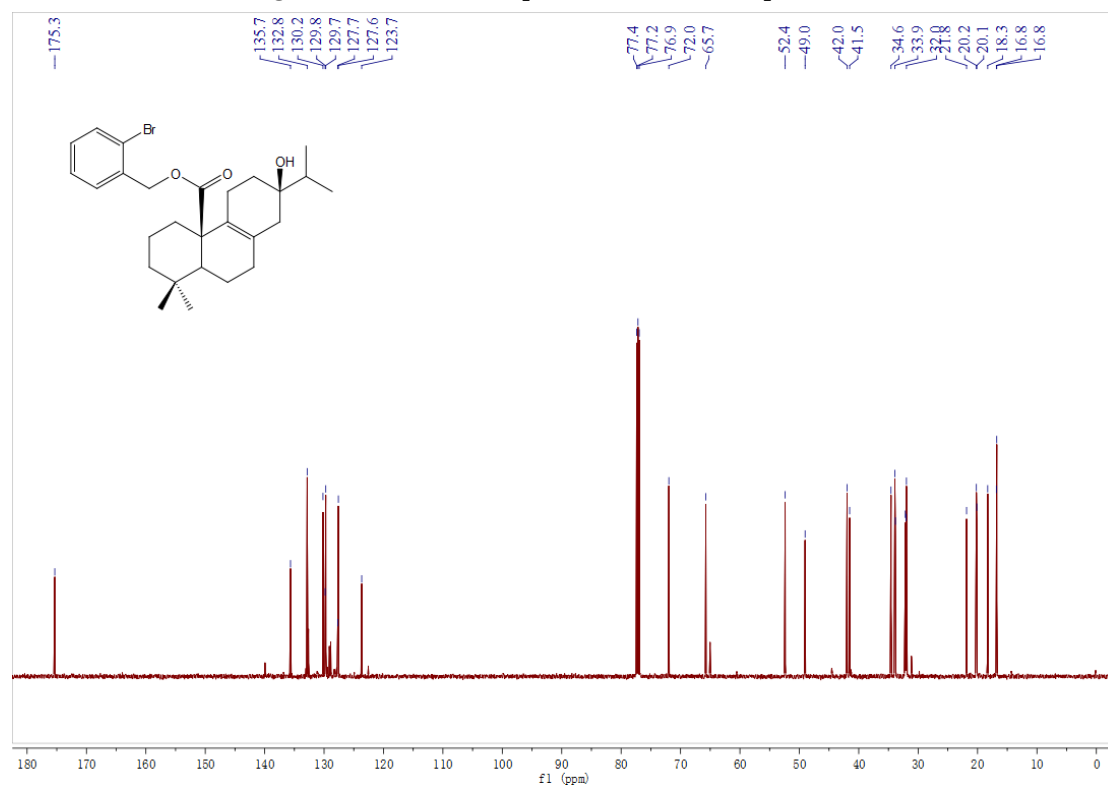

Figure S26. <sup>13</sup>C NMR spectrum of the compound **3i**.

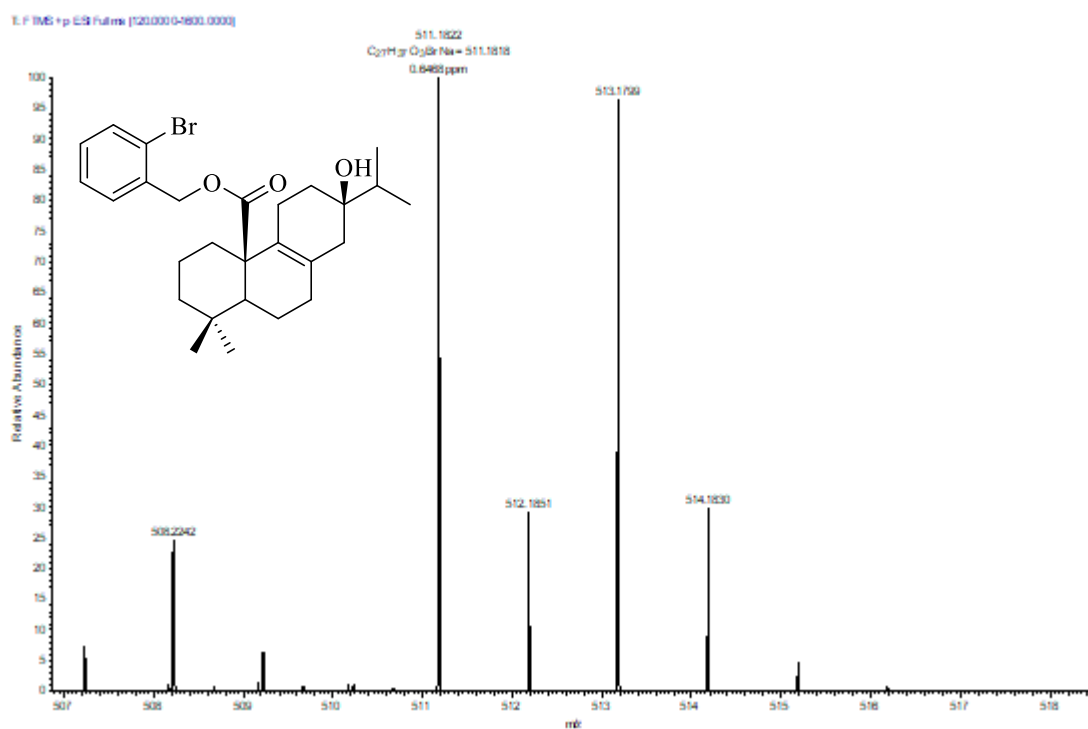

Figure S27. HRMS spectrum of the compound 3i.

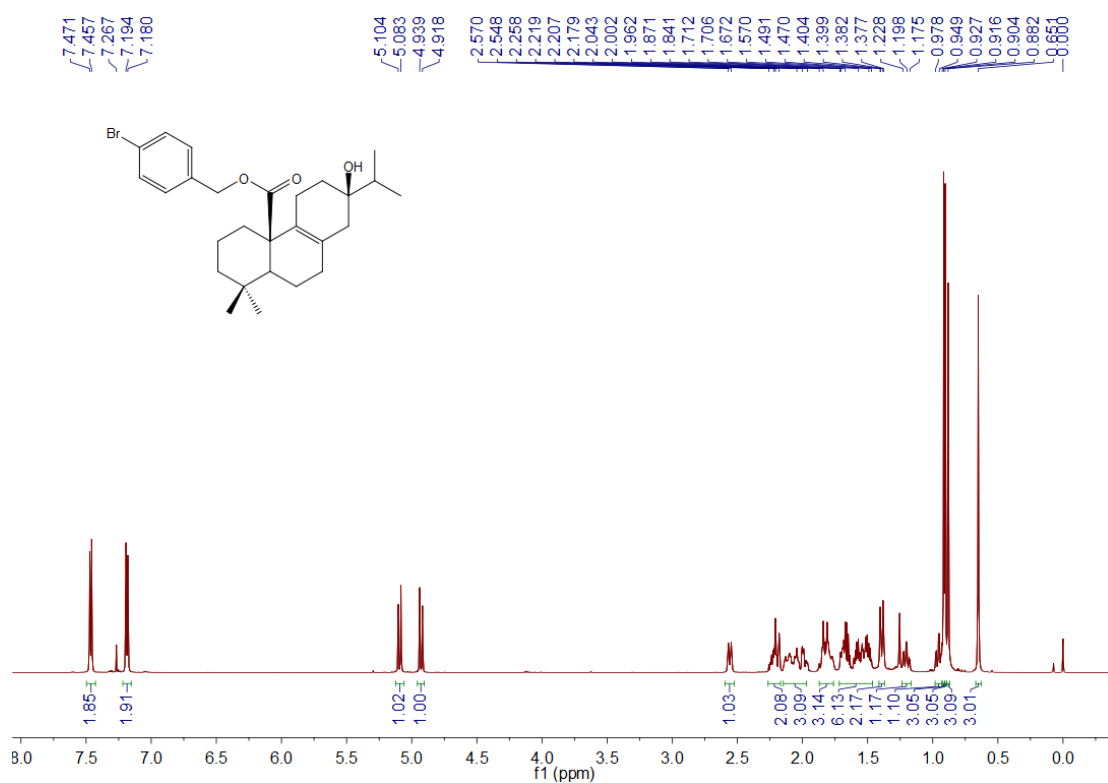

Figure S28.  $^1\text{H}$  NMR spectrum of the compound 3j.

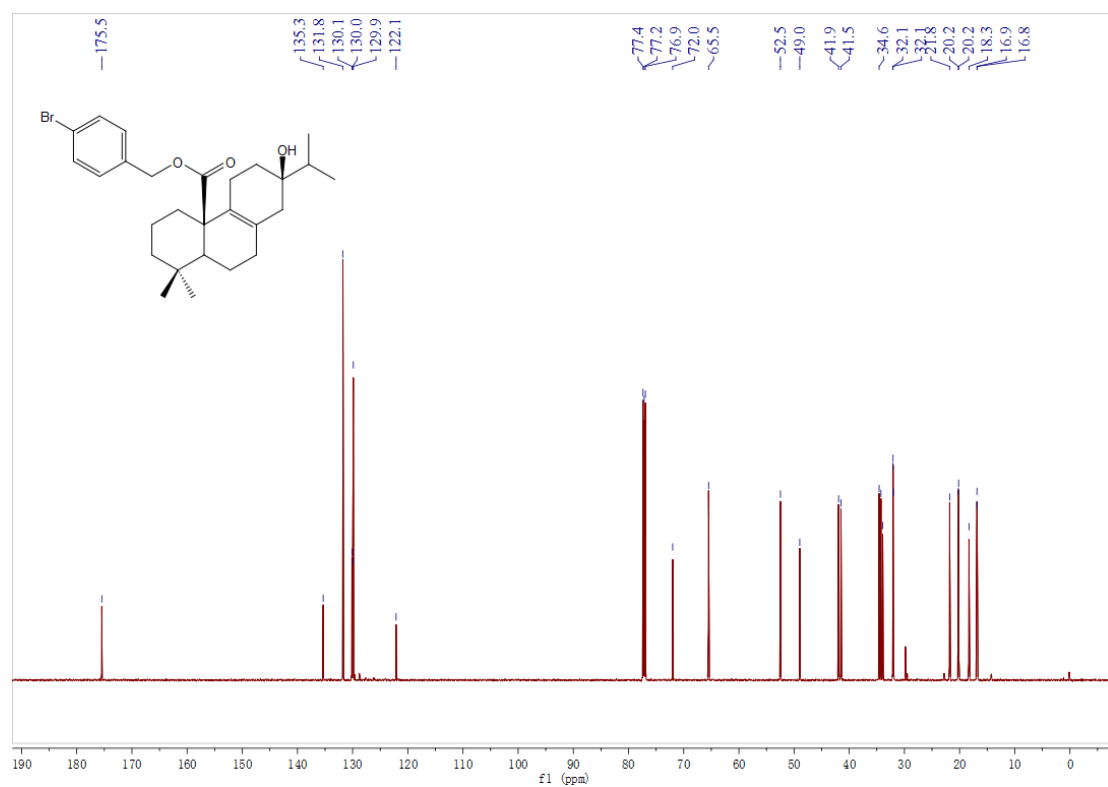

Figure S29. <sup>13</sup>C NMR spectrum of the compound 3j.

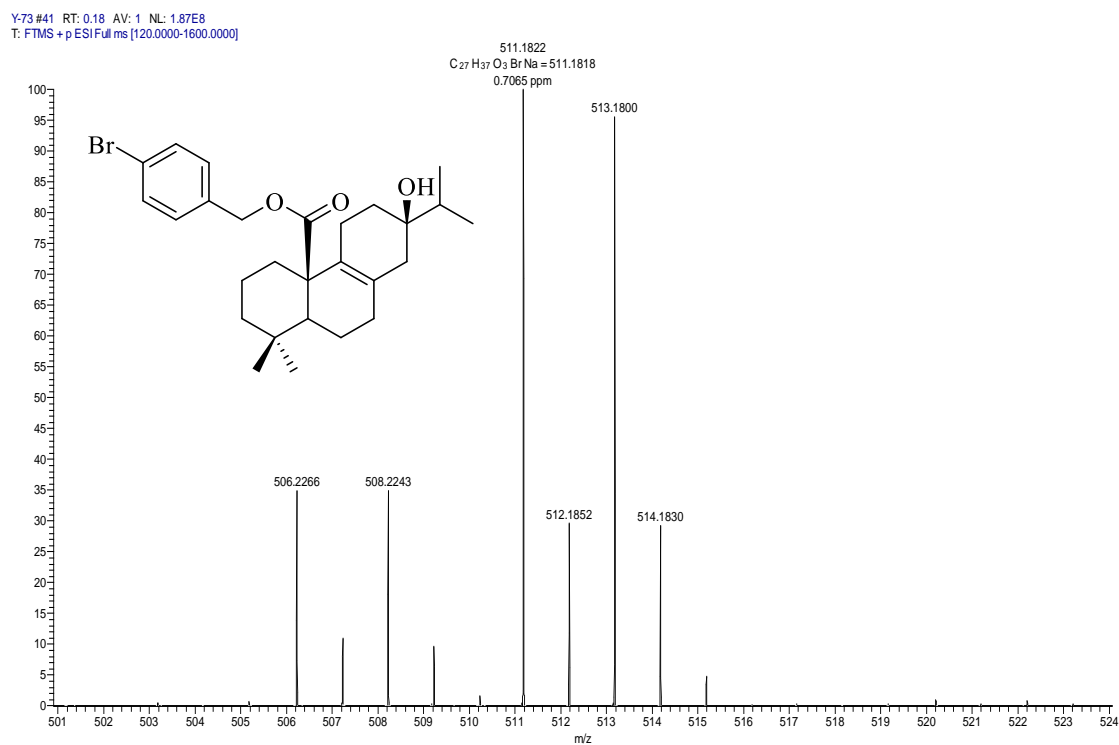

Figure S30. HRMS spectrum of the compound 3j.

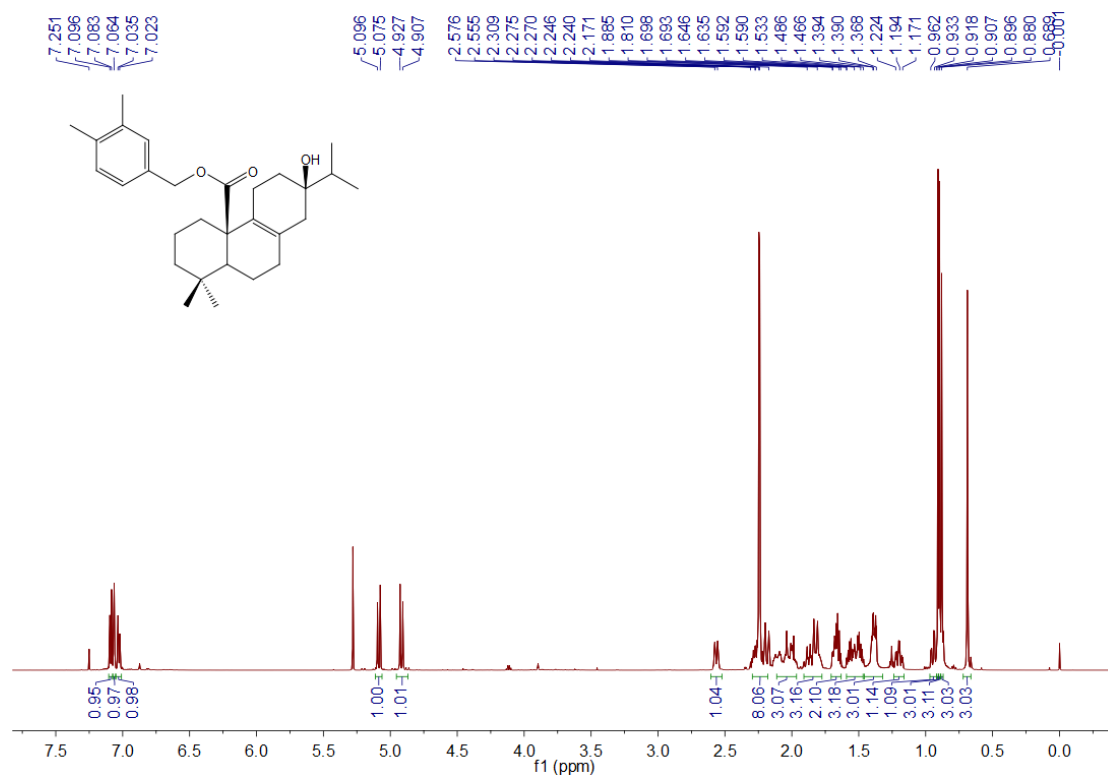

Figure S31. <sup>1</sup>H NMR spectrum of the compound 3k.

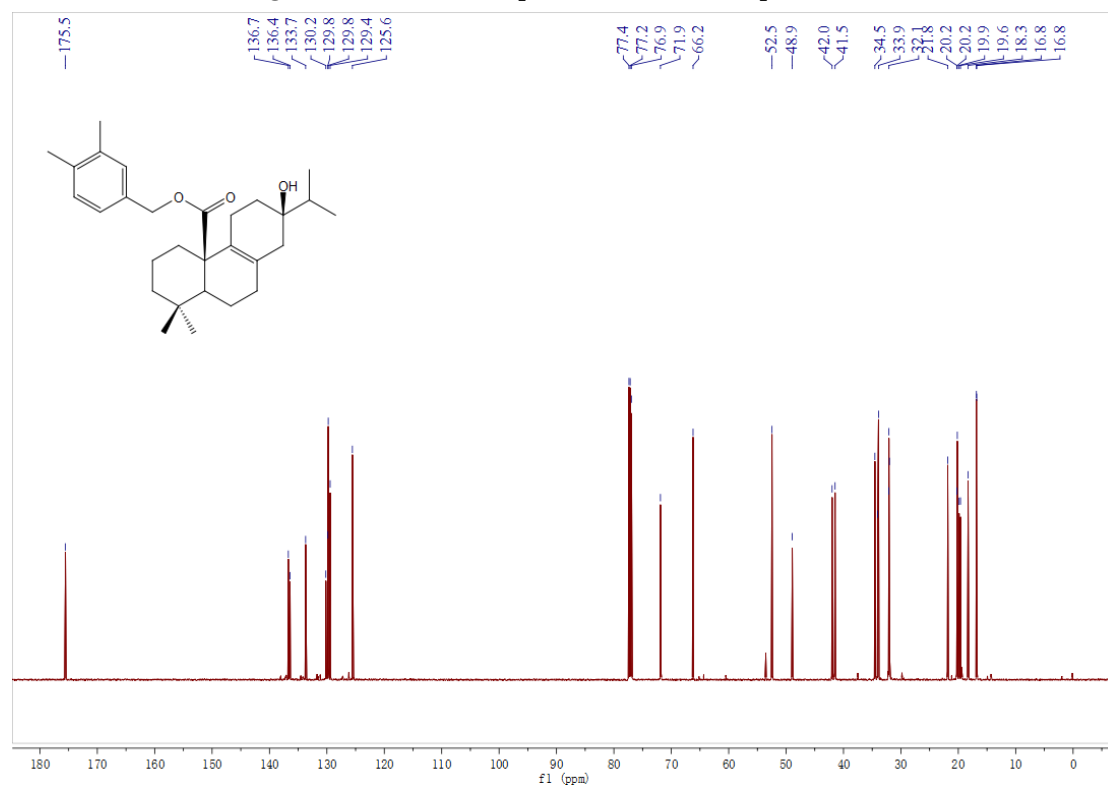

Figure S32. <sup>13</sup>C NMR spectrum of the compound 3k.

Y-55 #44 RT: 0.19 AV: 1 NL: 2.03E8  
T: FTMS + p ESI Full ms [120.0000-1600.0000]

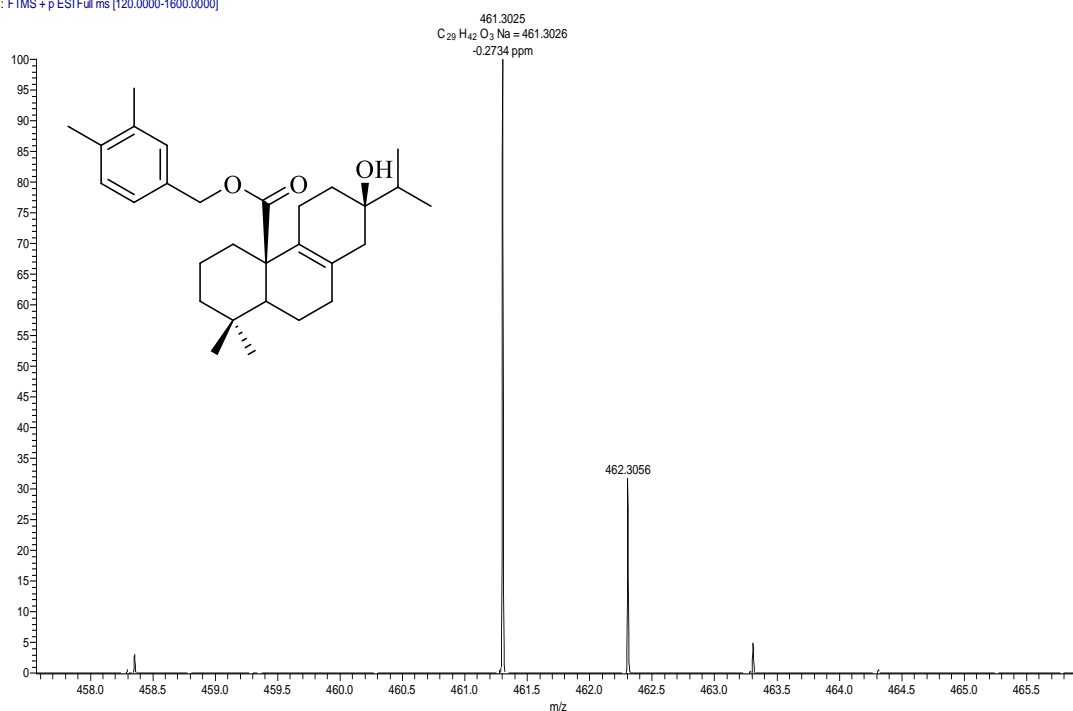

Figure S33. HRMS spectrum of the compound 3k.

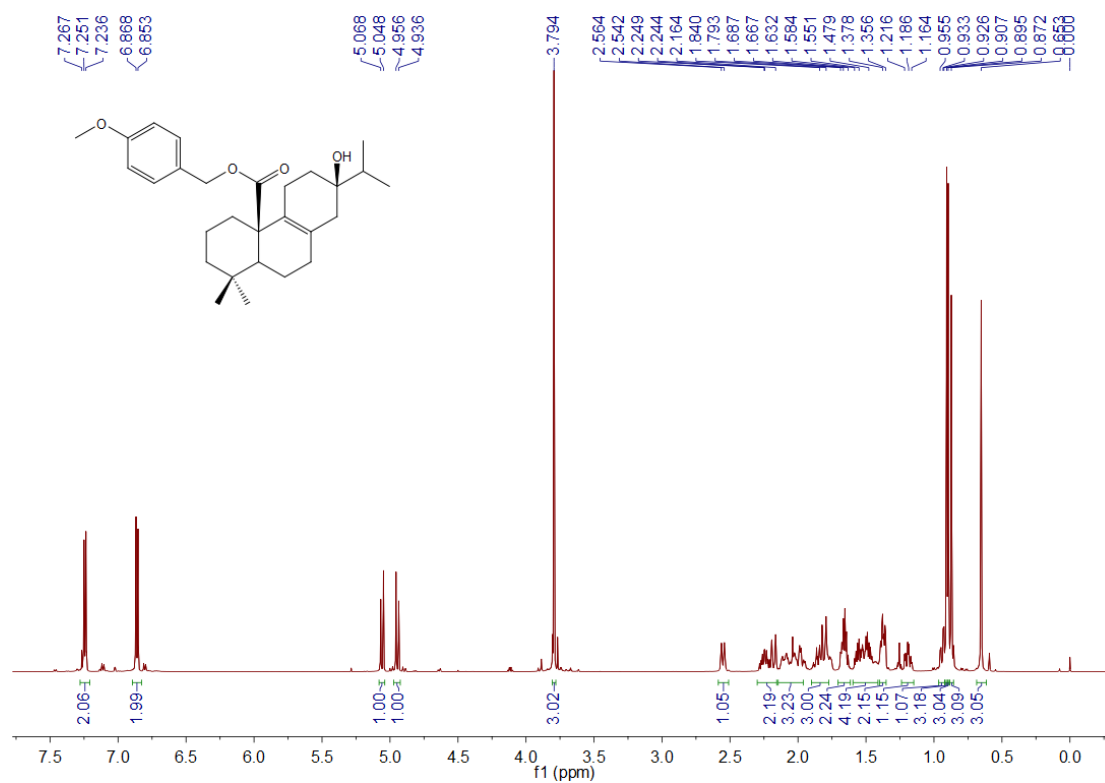

Figure S34. <sup>1</sup>H NMR spectrum of the compound 3l.

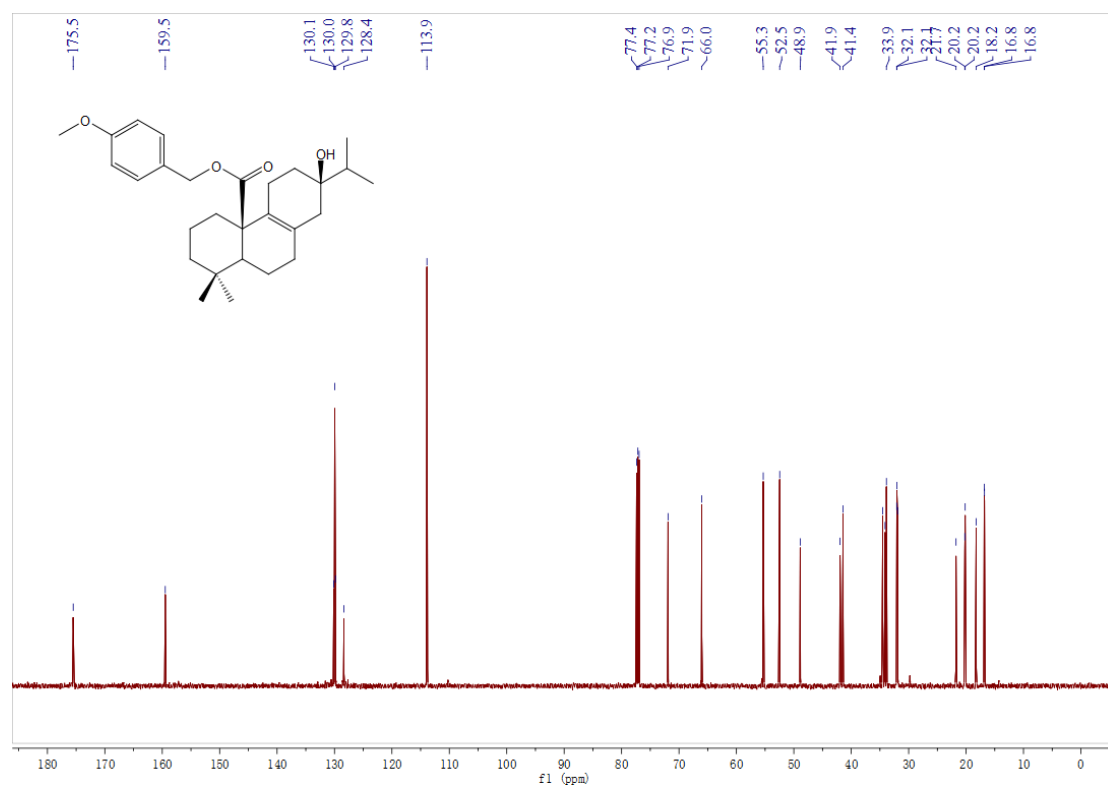

Figure S35. <sup>13</sup>C NMR spectrum of the compound 31.

Y-53 #43 RT: 0.19 AV: 1 NL: 8.70E8  
T: FTMS + p ESI Full ms [120.0000-1600.0000]

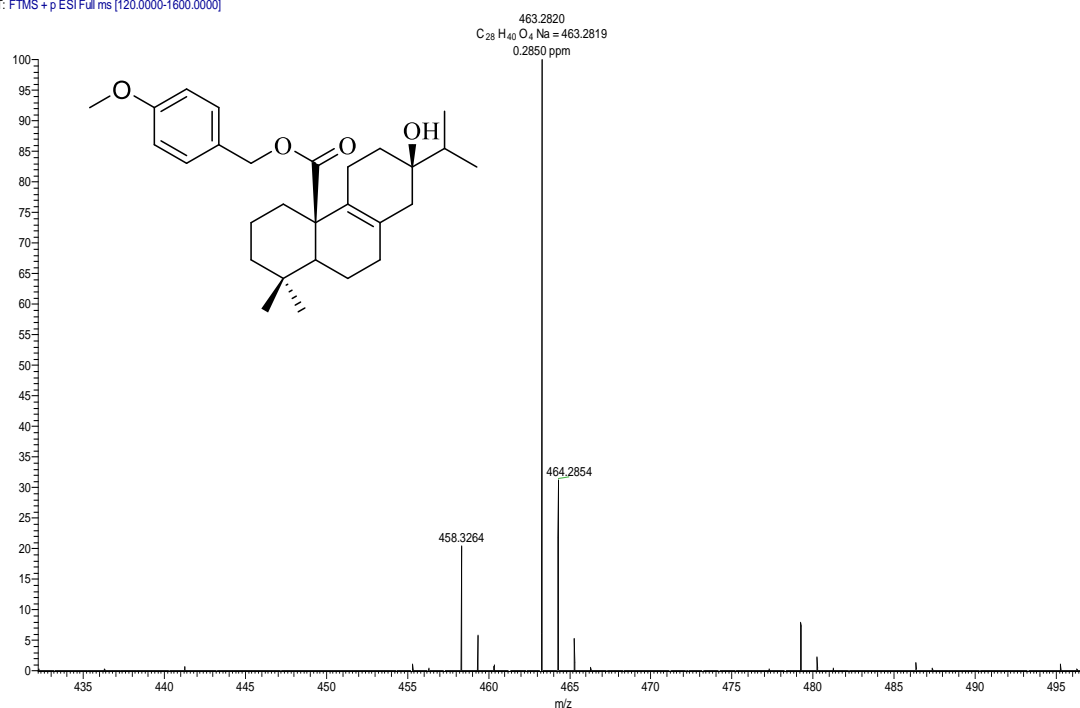

Figure S36. HRMS spectrum of the compound 31.

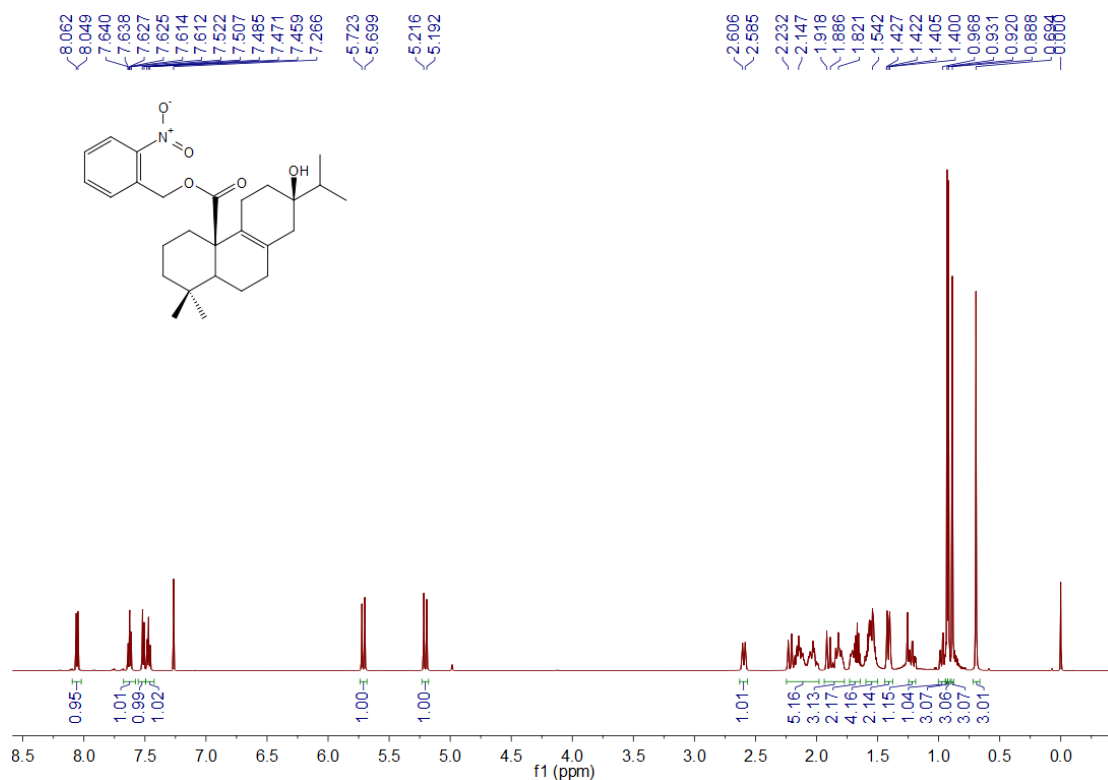

Figure S37. <sup>1</sup>H NMR spectrum of the compound 3m.

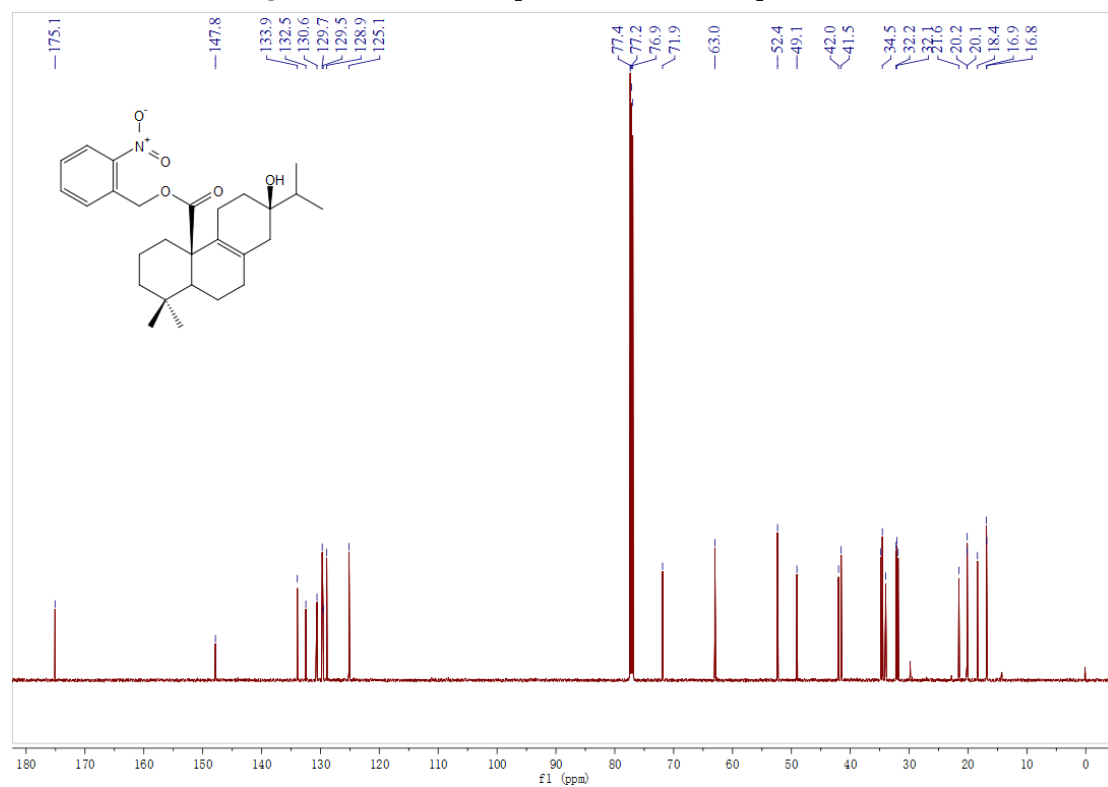

Figure S38. <sup>13</sup>C NMR spectrum of the compound 3m.



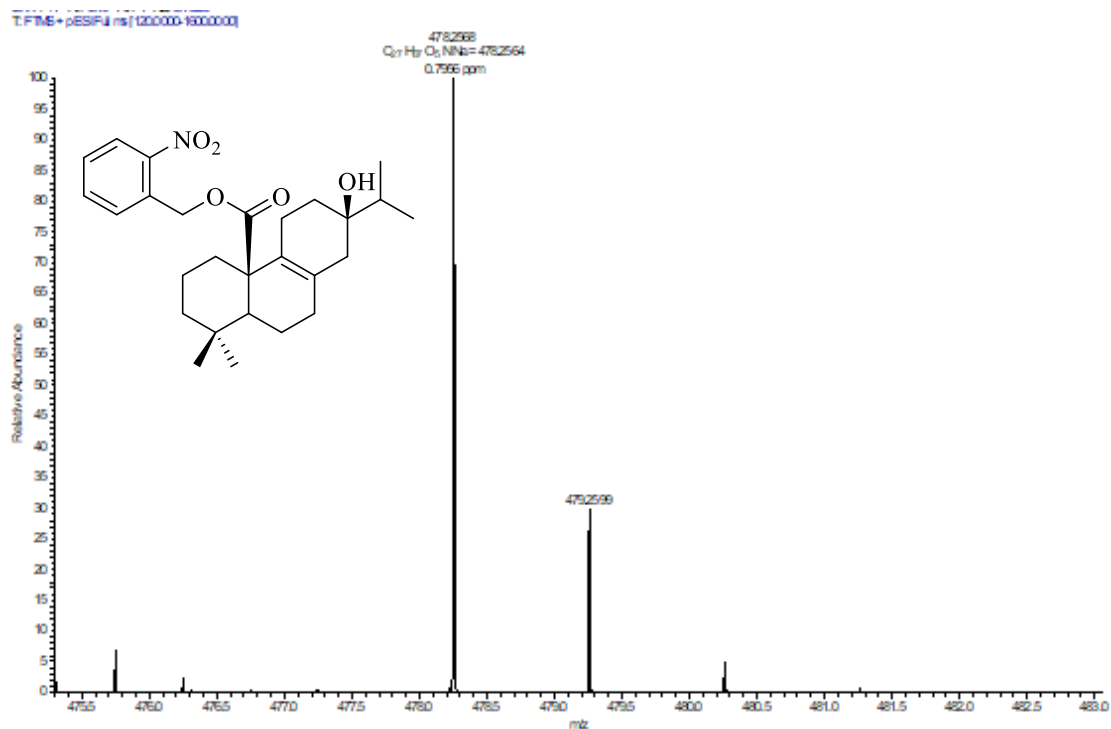

Figure S39. HRMS spectrum of the compound 3m.

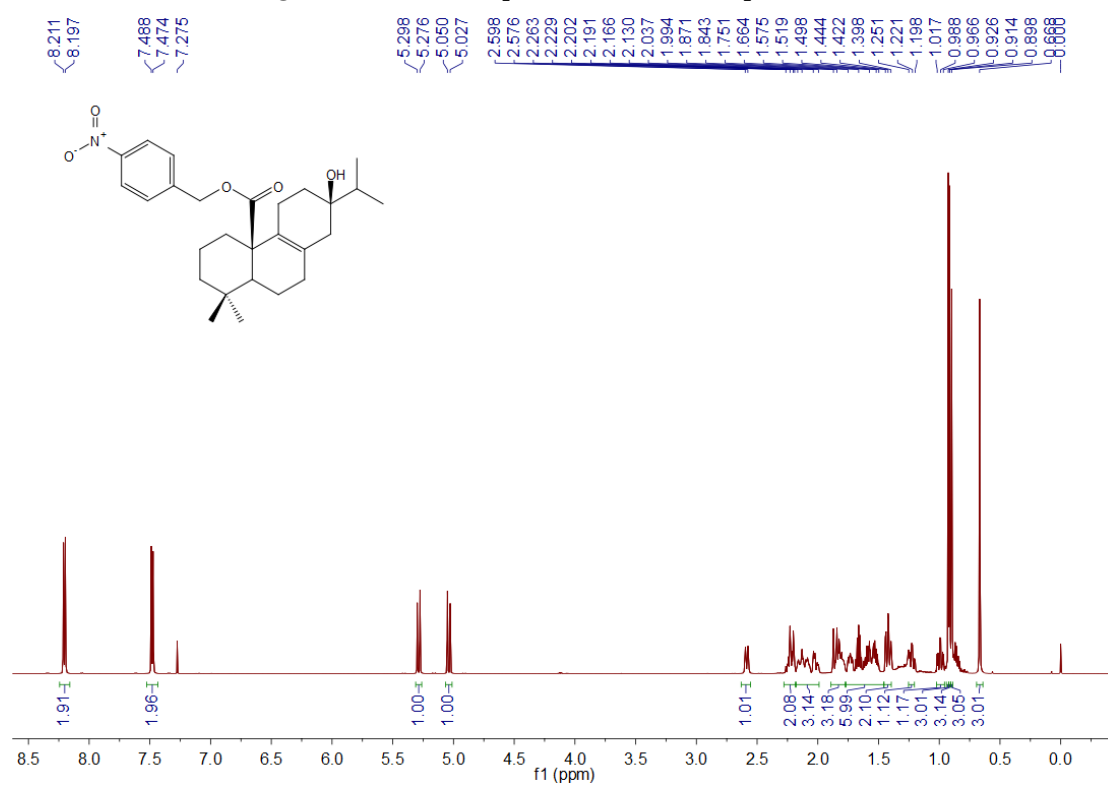

Figure S40. <sup>1</sup>H NMR spectrum of the compound 3n.

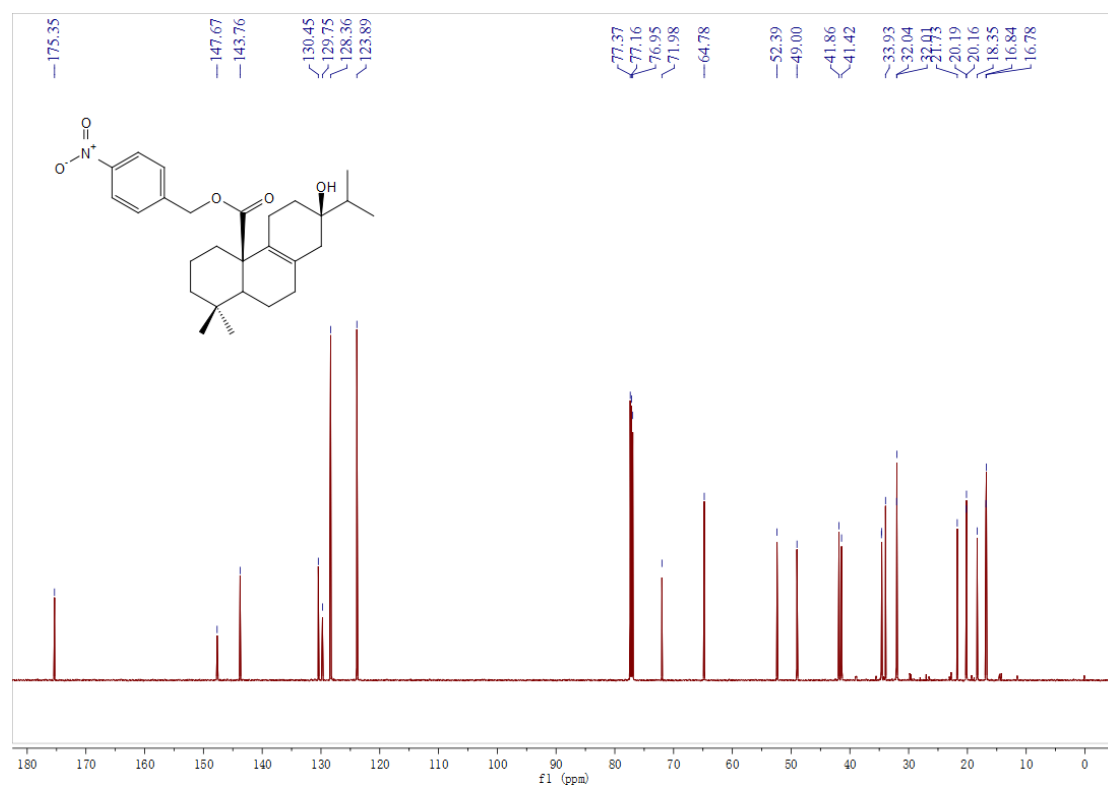

Figure S41. <sup>13</sup>C NMR spectrum of the compound 3n.

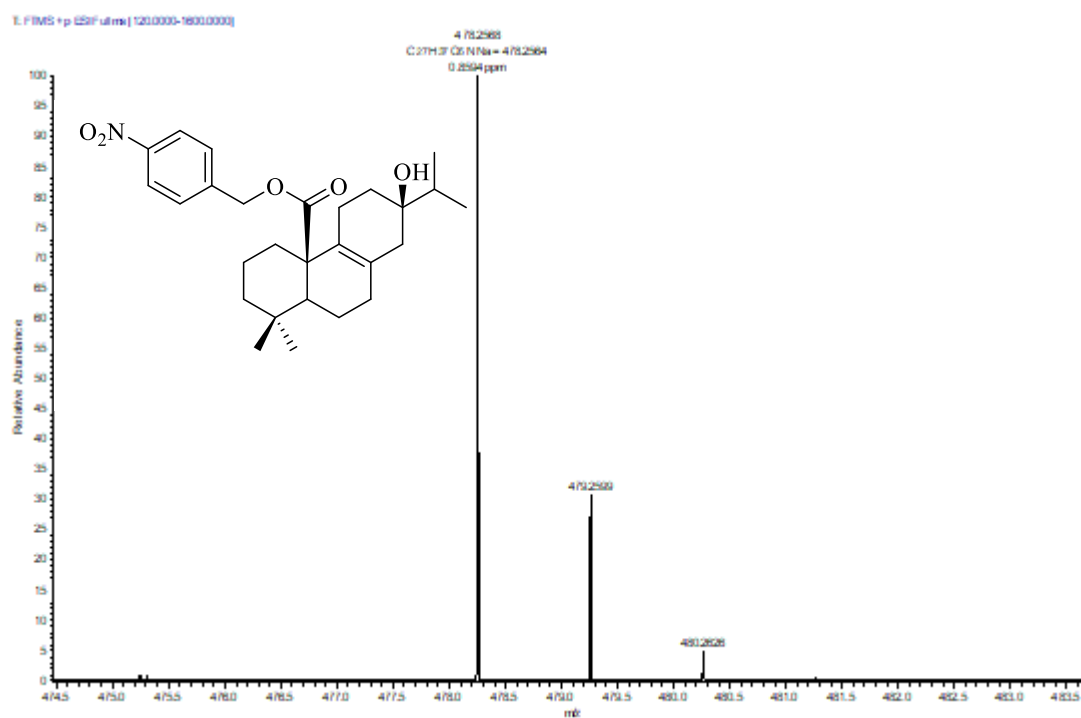

Figure S42. HRMS spectrum of the compound 3n.

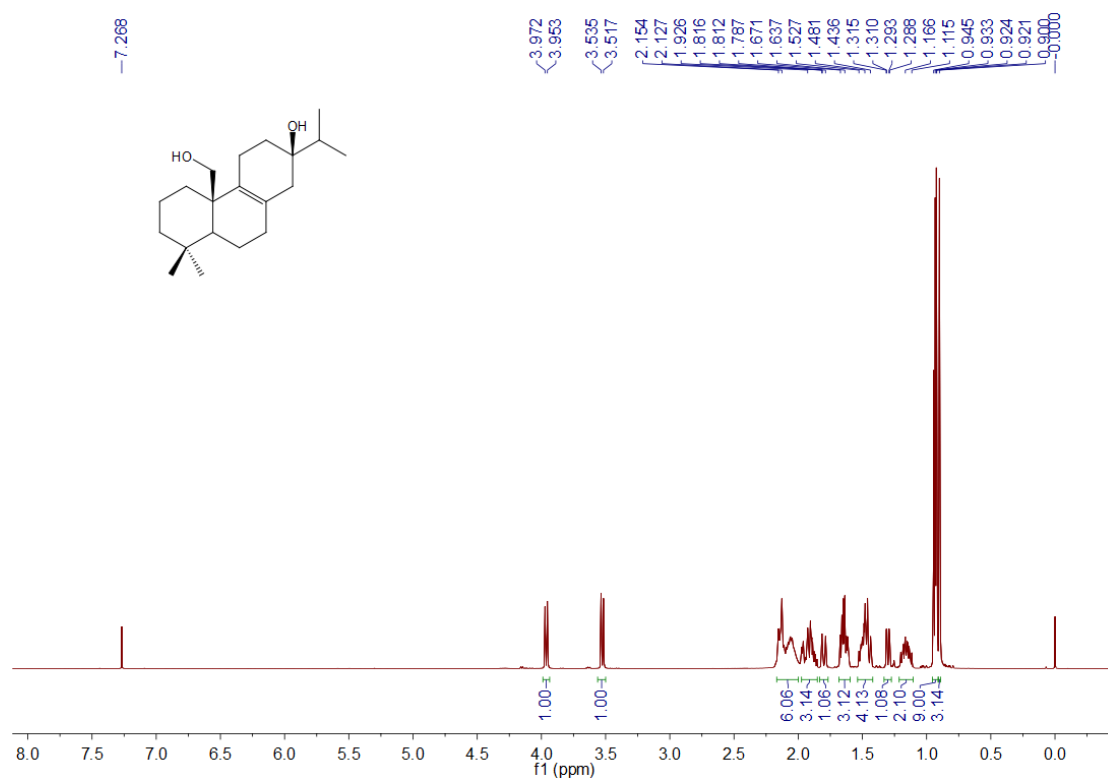

Figure S43. <sup>1</sup>H NMR spectrum of the compound 4.

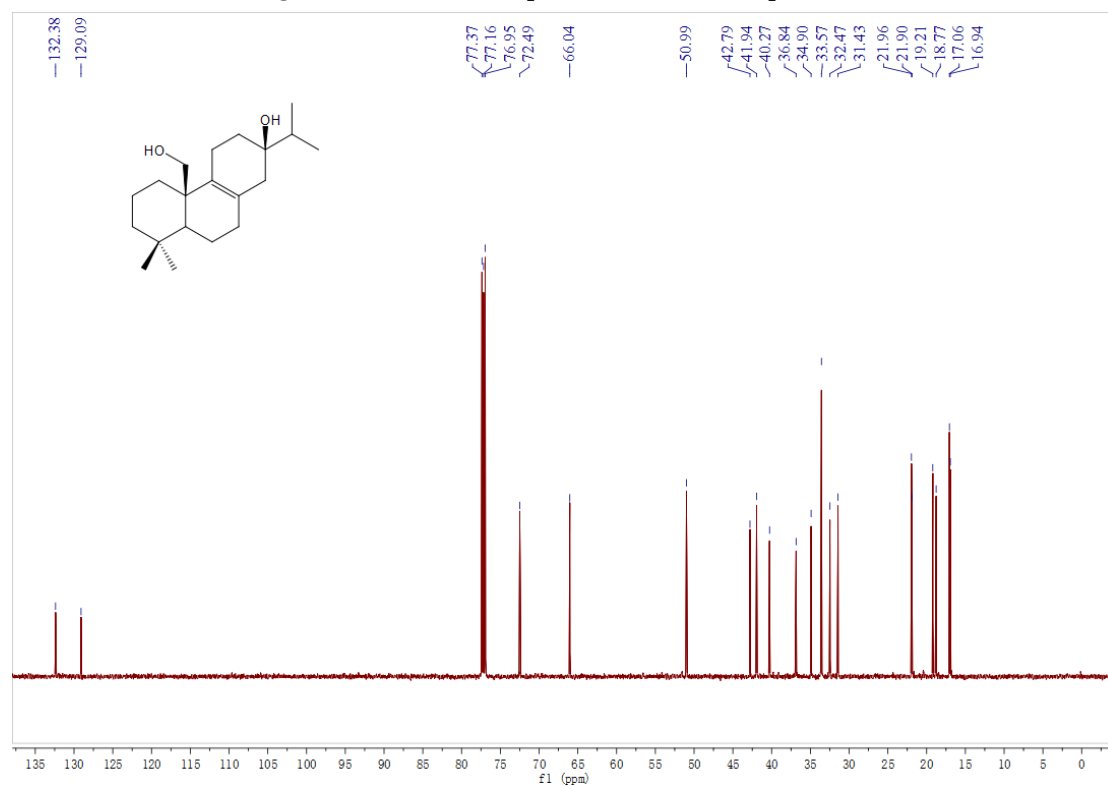

Figure S44. <sup>13</sup>C NMR spectrum of the compound 4.

Y:92 #42 RT: 0.18 AV: 1 NL: 1.33E9  
T: FTMS + p ESI Full ms [120.0000-1600.0000]

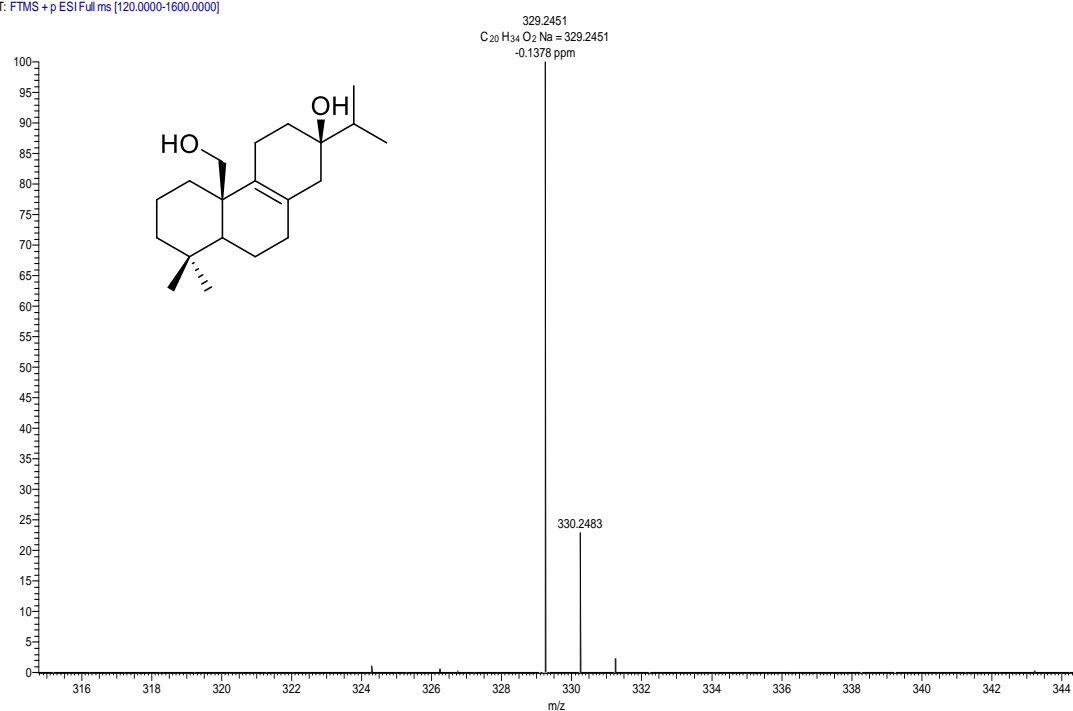

Figure S45. HRMS spectrum of the compound 4.

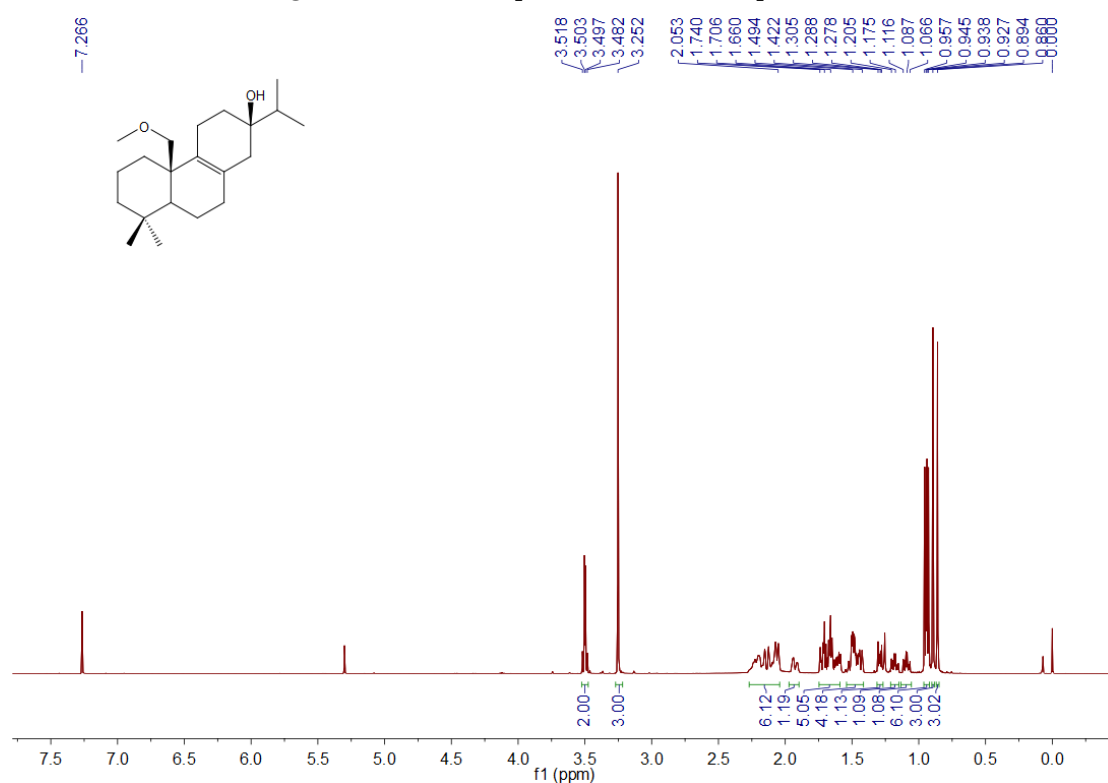

Figure S46. <sup>1</sup>H NMR spectrum of the compound 5a.

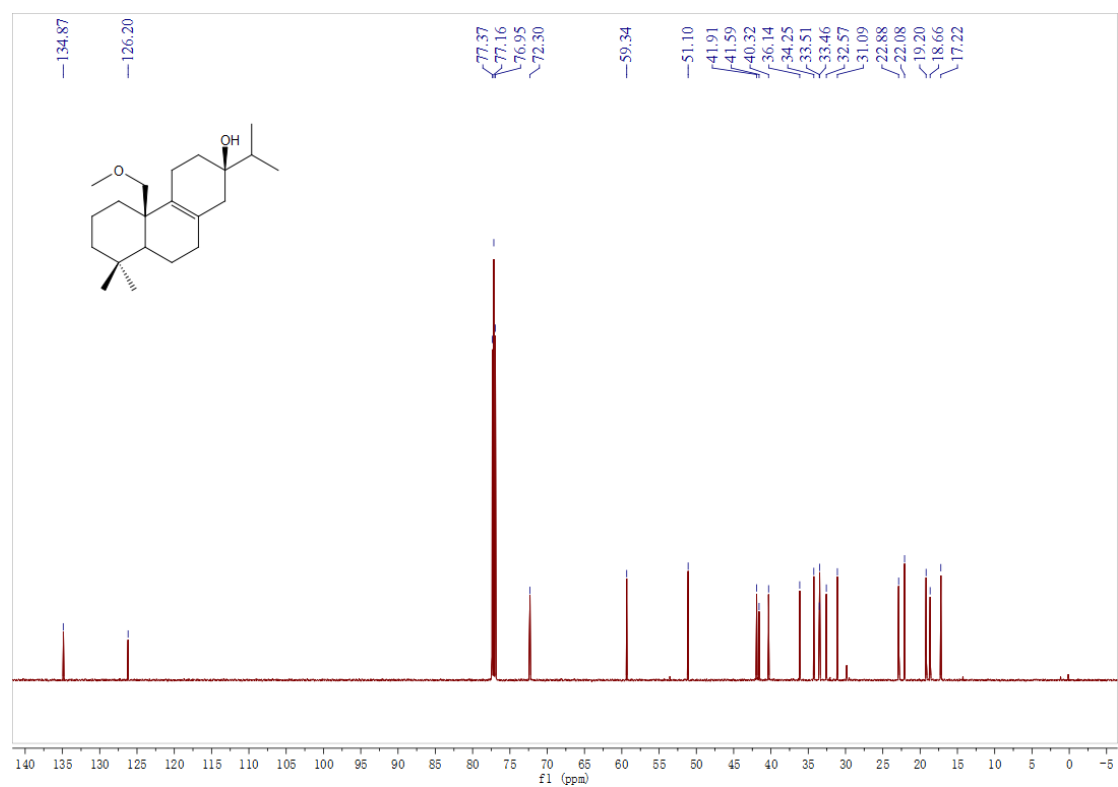

Figure S47. <sup>13</sup>C NMR spectrum of the compound 5a.

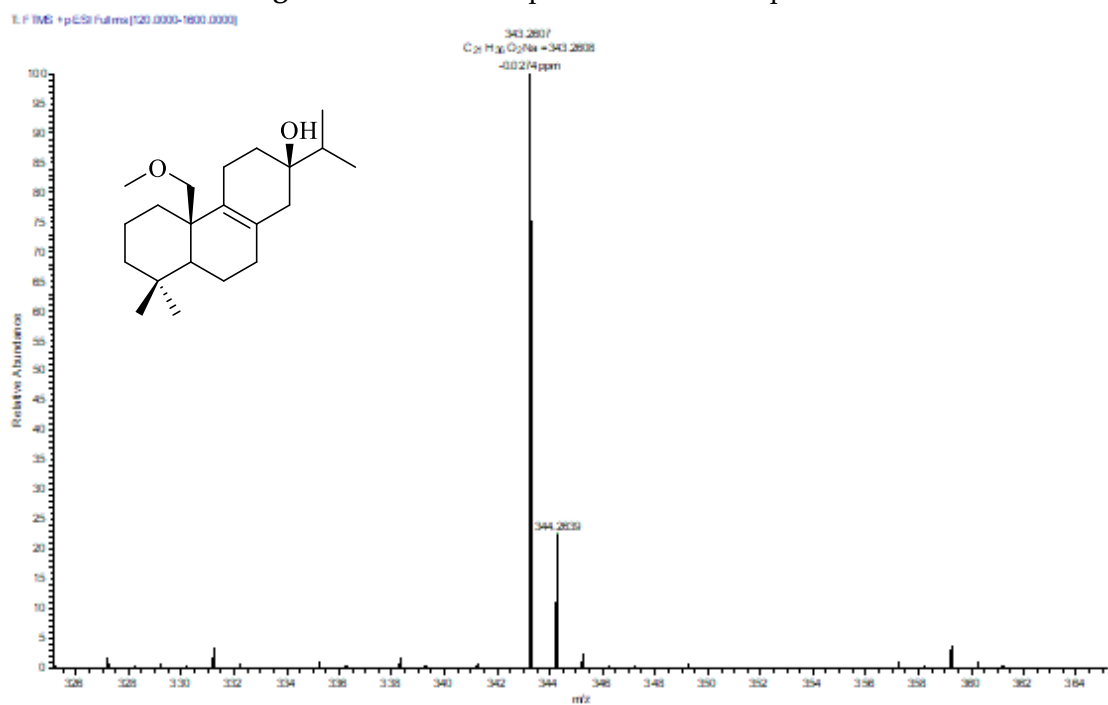

Figure S48. HRMS spectrum of the compound 5a.

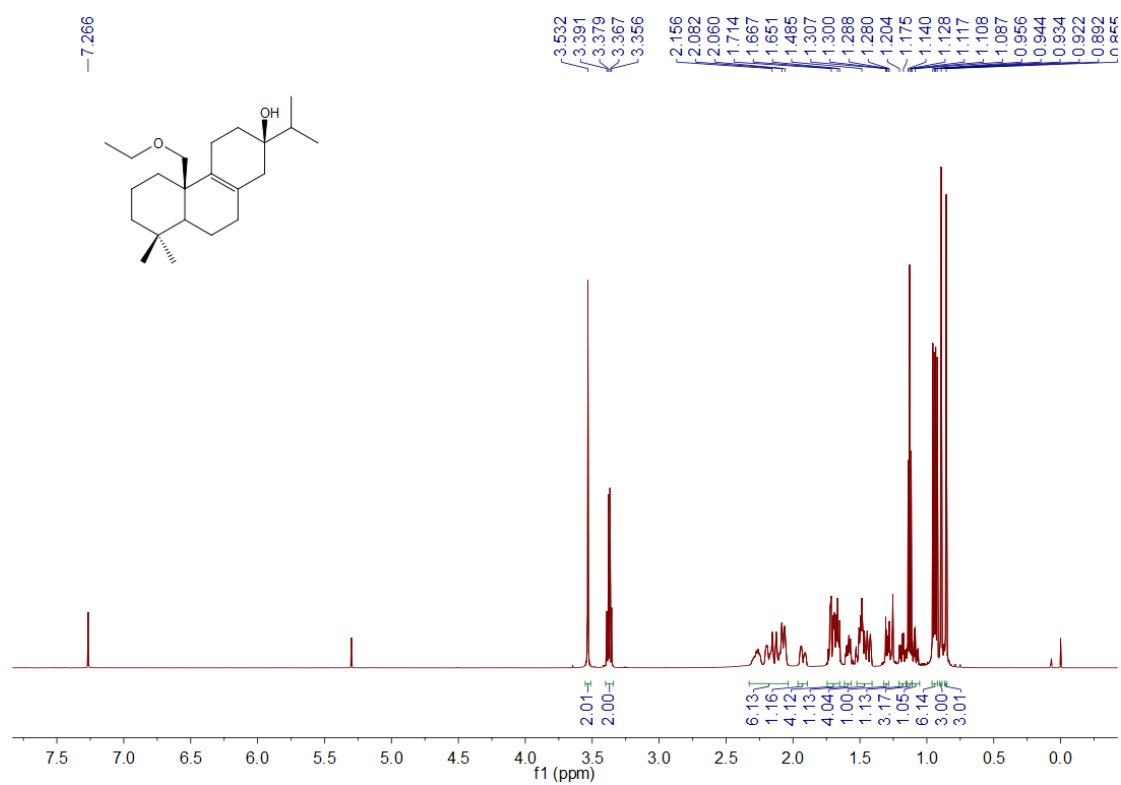

Figure S49. <sup>1</sup>H NMR spectrum of the compound 5b.

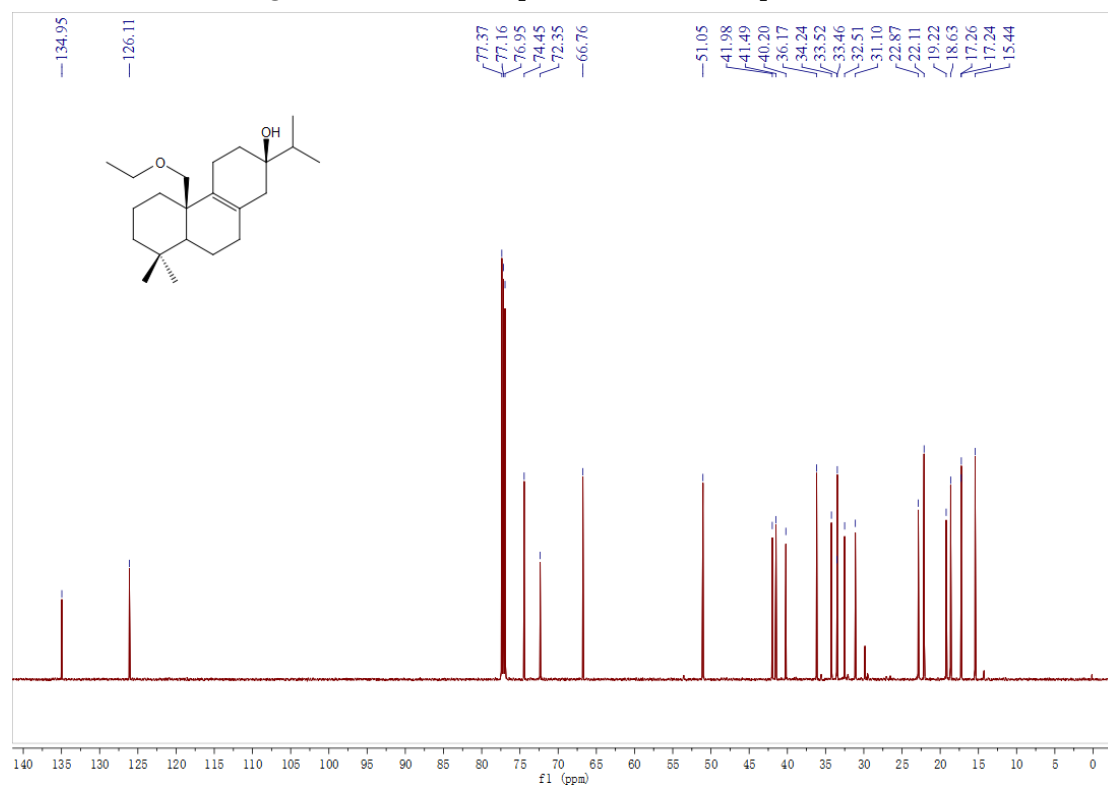

Figure S50. <sup>13</sup>C NMR spectrum of the compound 5b.

LW-28 #36 RT: 0.16 AV: 1 NL: 2.50E8  
T: FTMS + p ESI Full ms [120.0000-1600.0000]

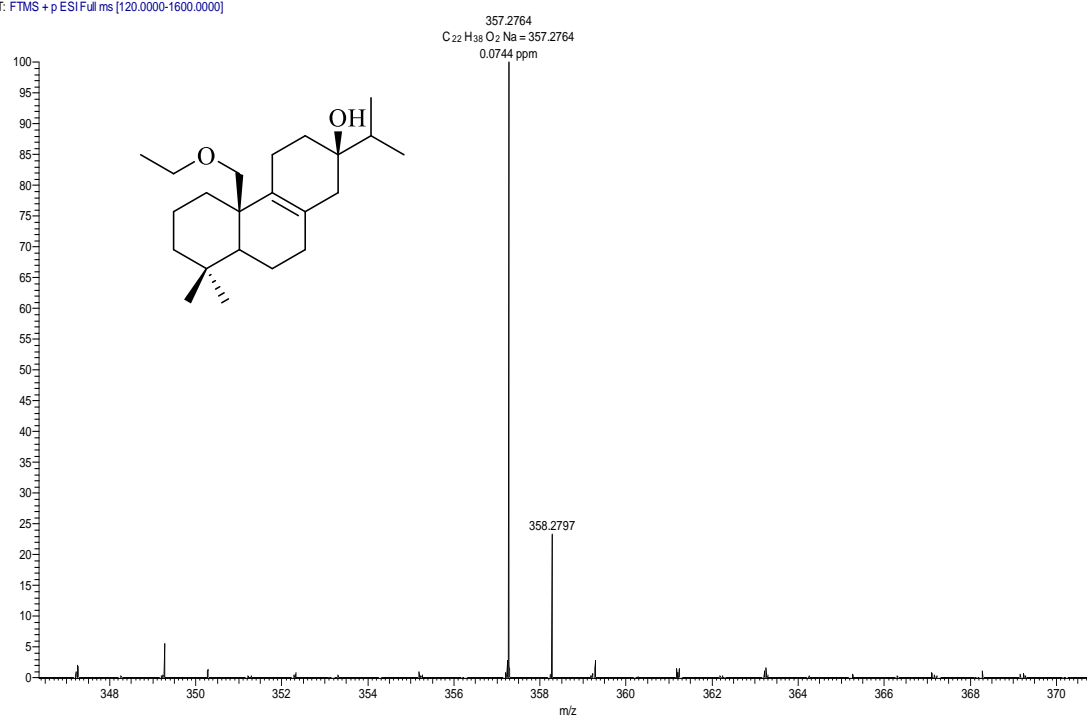

Figure S51. HRMS spectrum of the compound 5b.

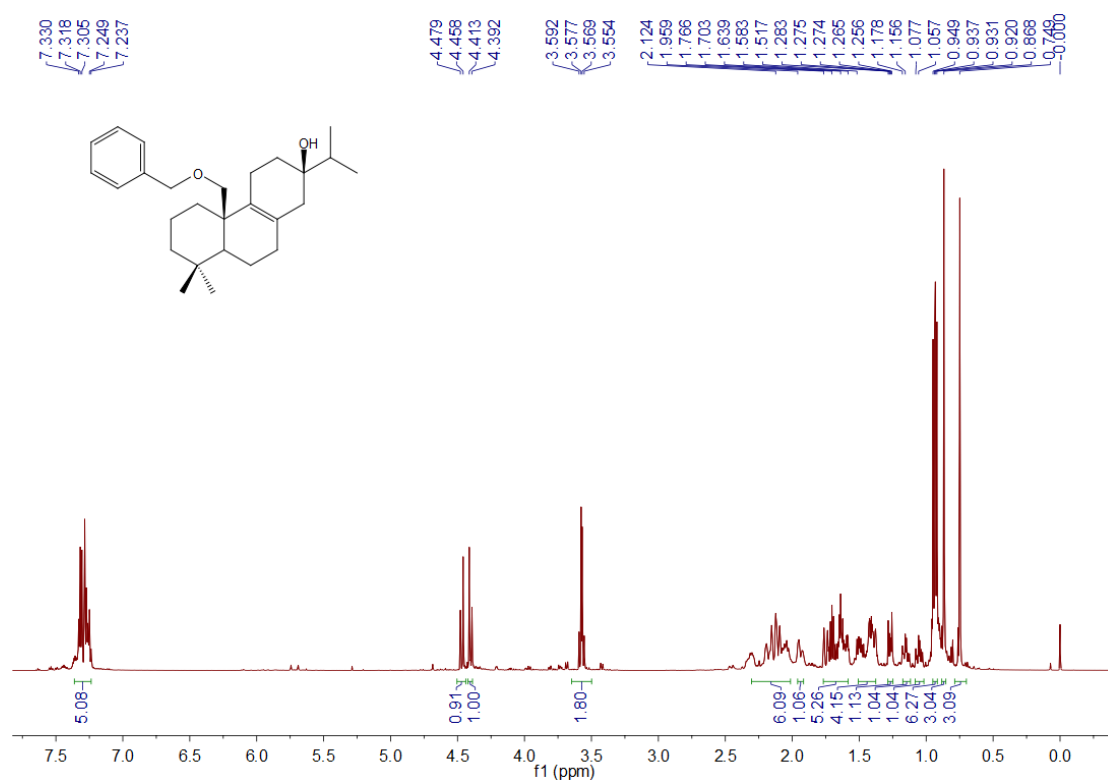

Figure S52. <sup>1</sup>H NMR spectrum of the compound 5c.

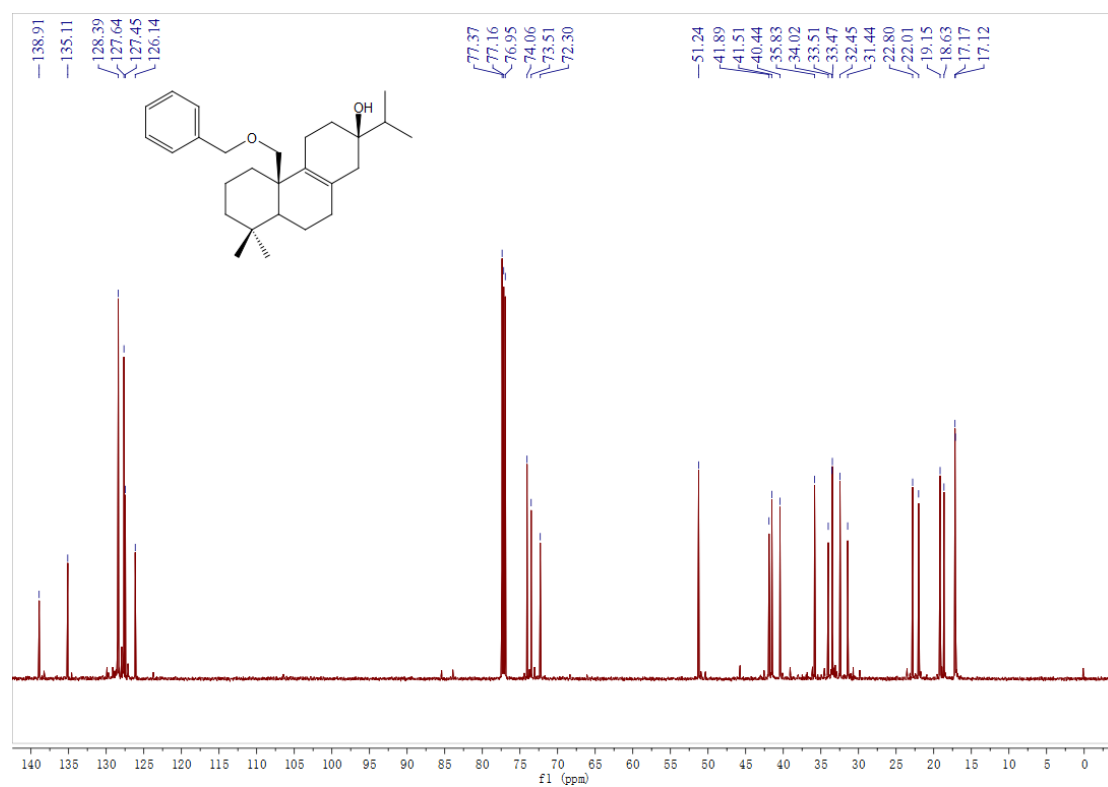

Figure S53. <sup>13</sup>C NMR spectrum of the compound 5c.

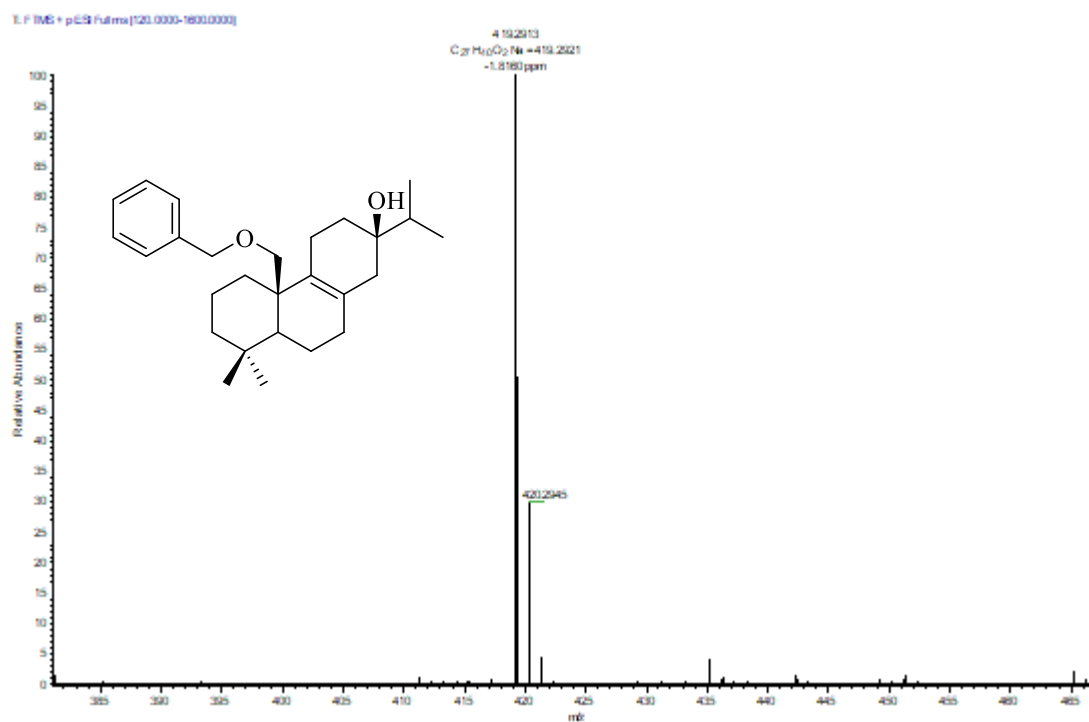

Figure S54. HRMS spectrum of the compound 5c.



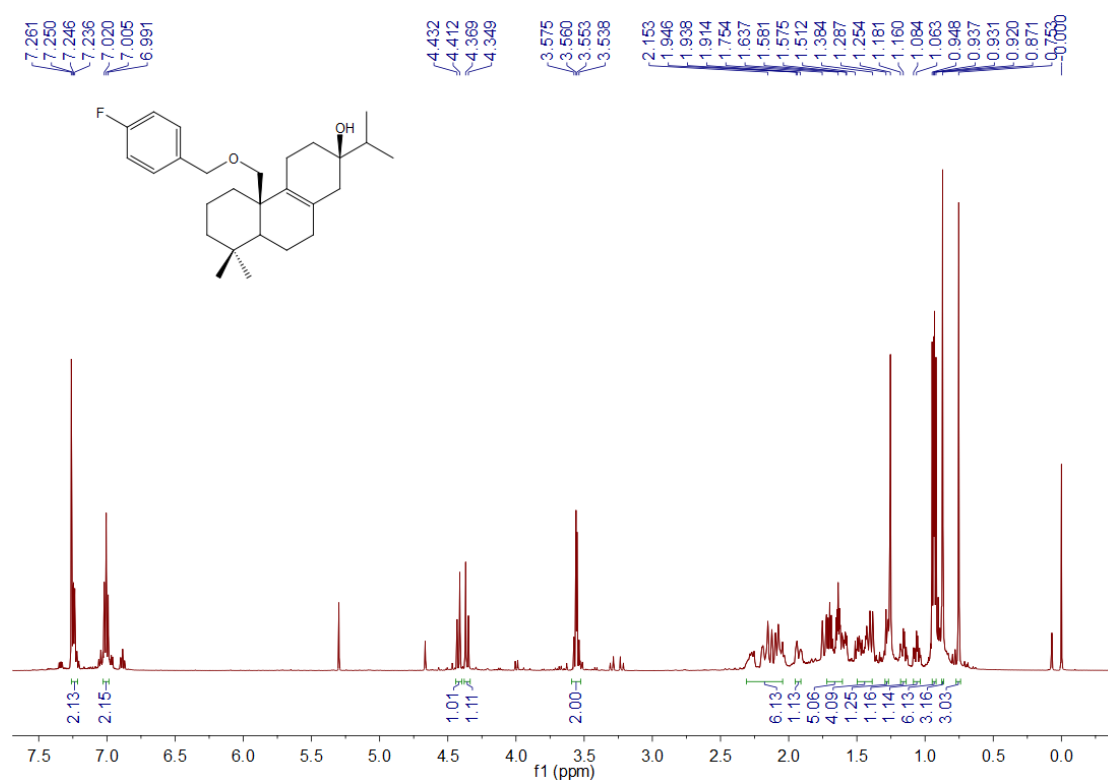

Figure S55. <sup>1</sup>H NMR spectrum of the compound 5d.

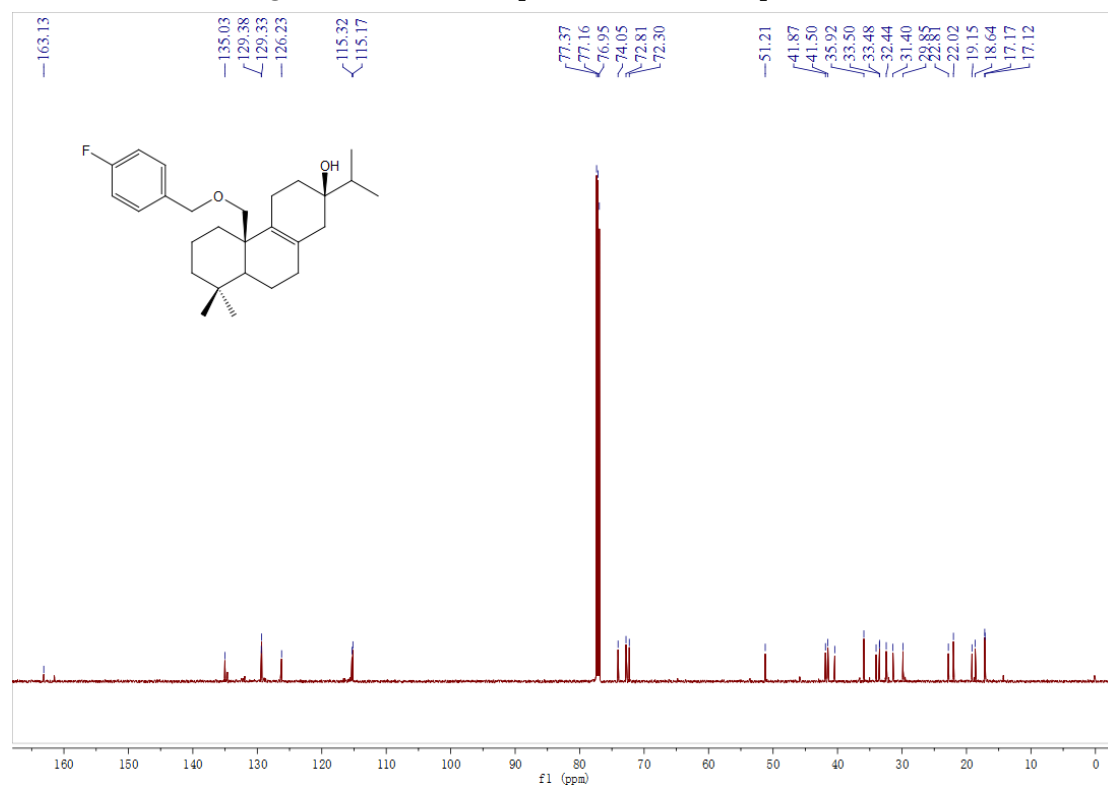

Figure S56. <sup>13</sup>C NMR spectrum of the compound 5d.

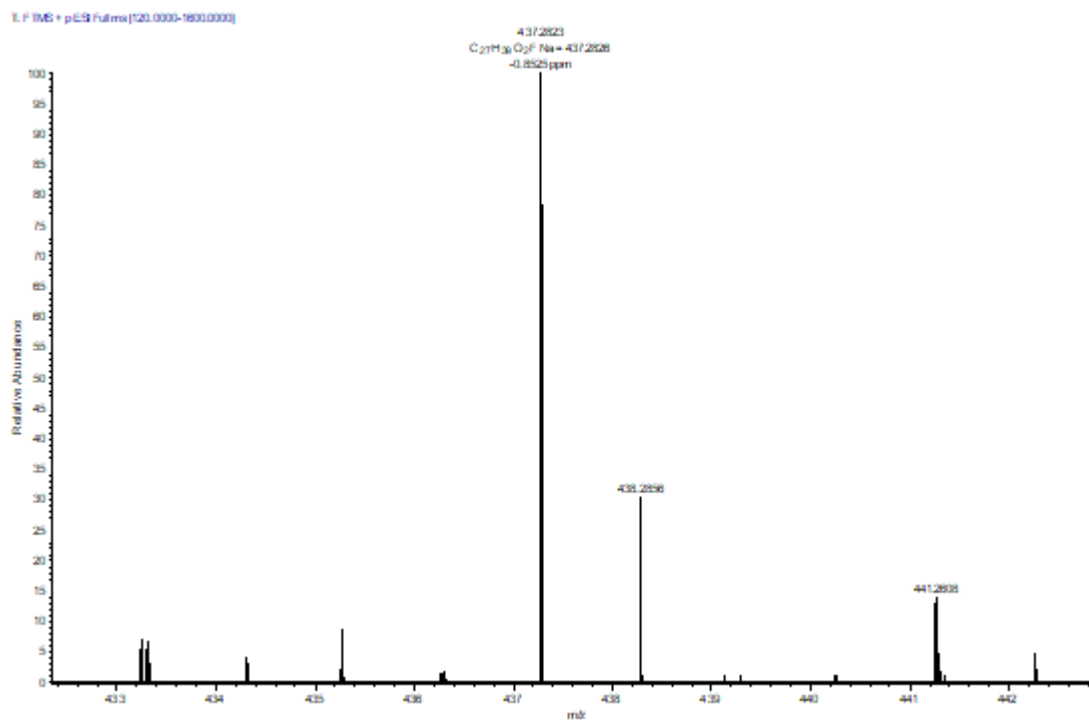

Figure S57. HRMS spectrum of the compound 5d.

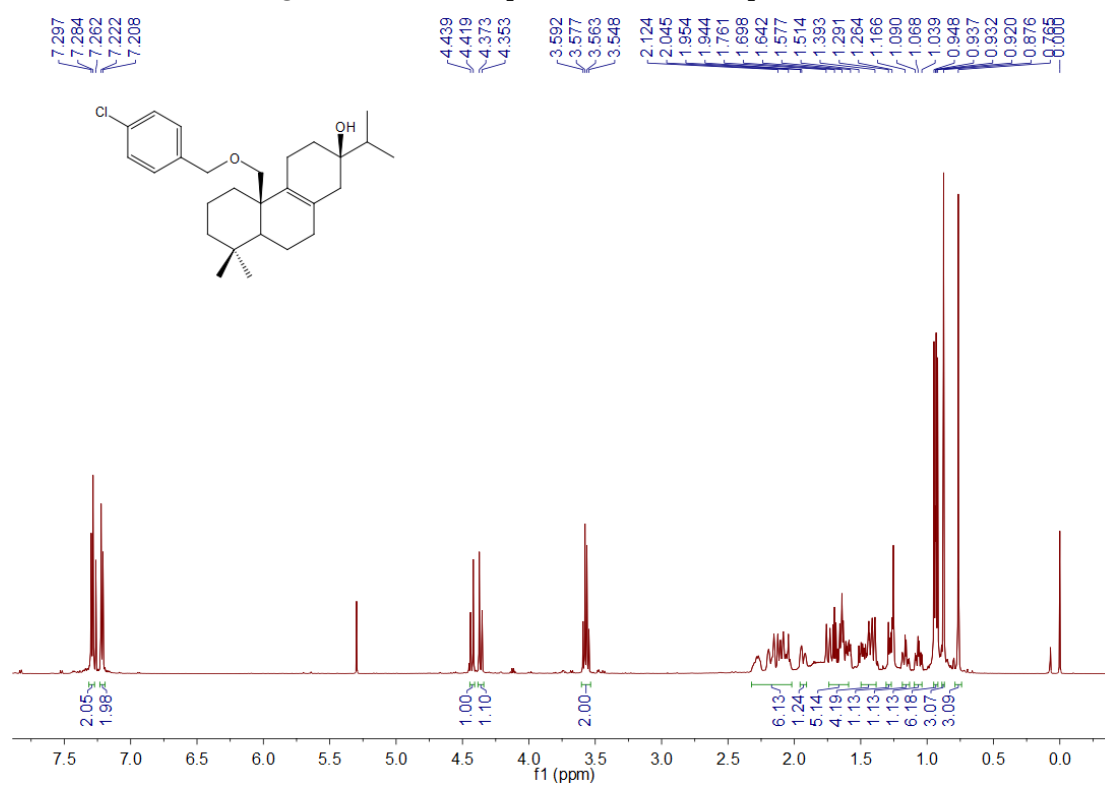

Figure S58. <sup>1</sup>H NMR spectrum of the compound 5e.

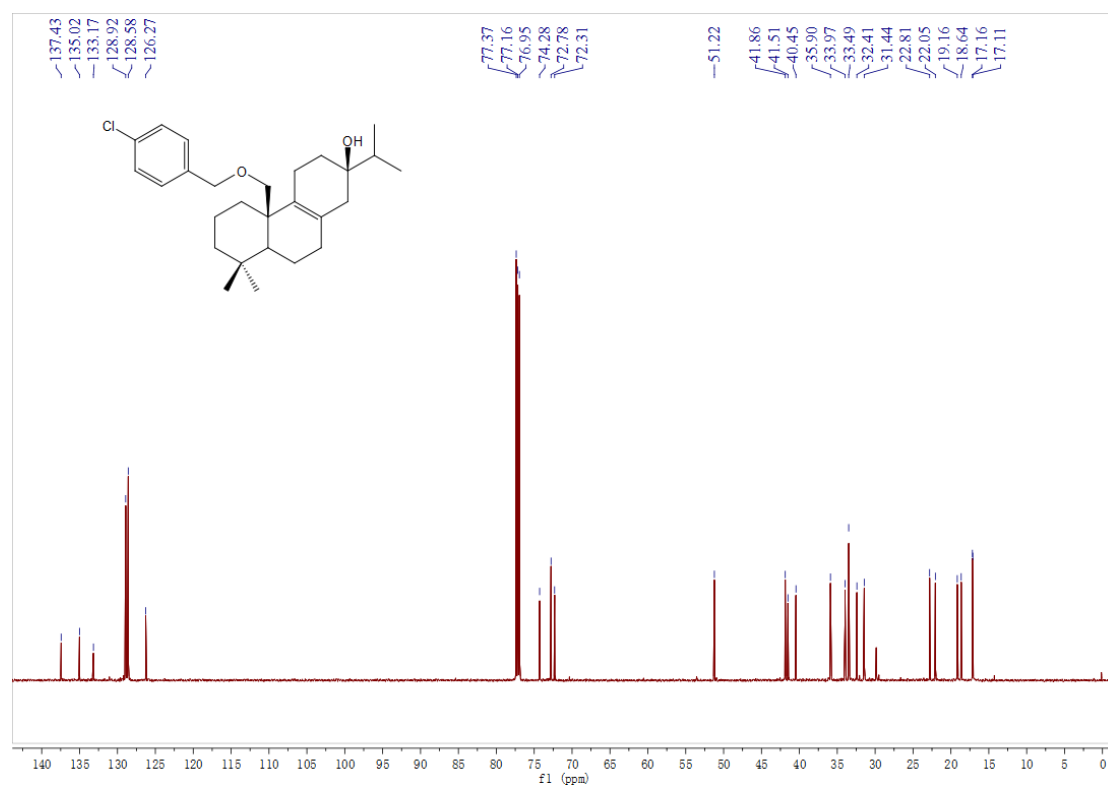

Figure S59.  $^{13}\text{C}$  NMR spectrum of the compound 5e.

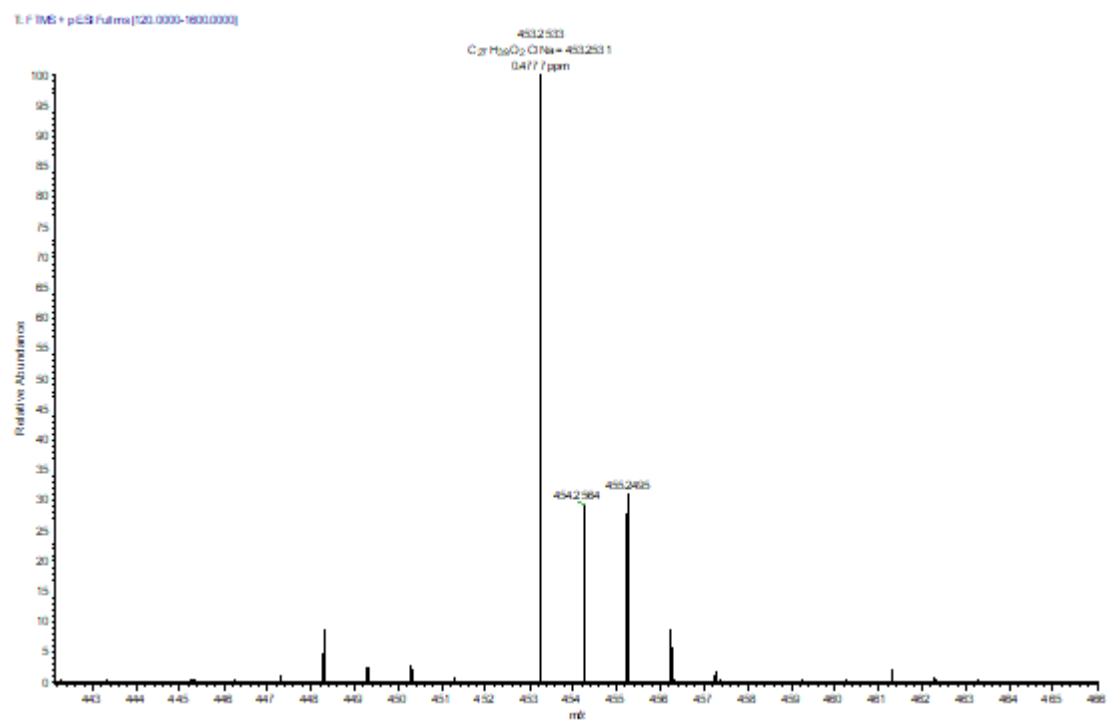

Figure S60. HRMS spectrum of the compound 5e.

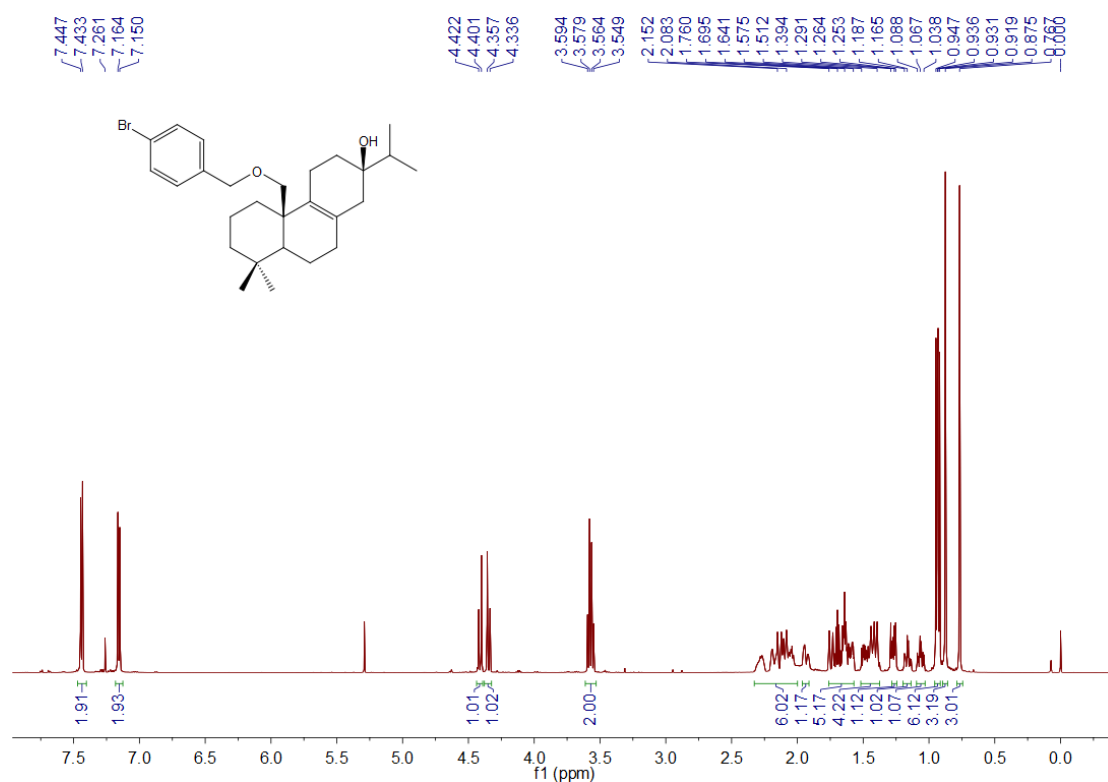

Figure S61. <sup>1</sup>H NMR spectrum of the compound 5f.

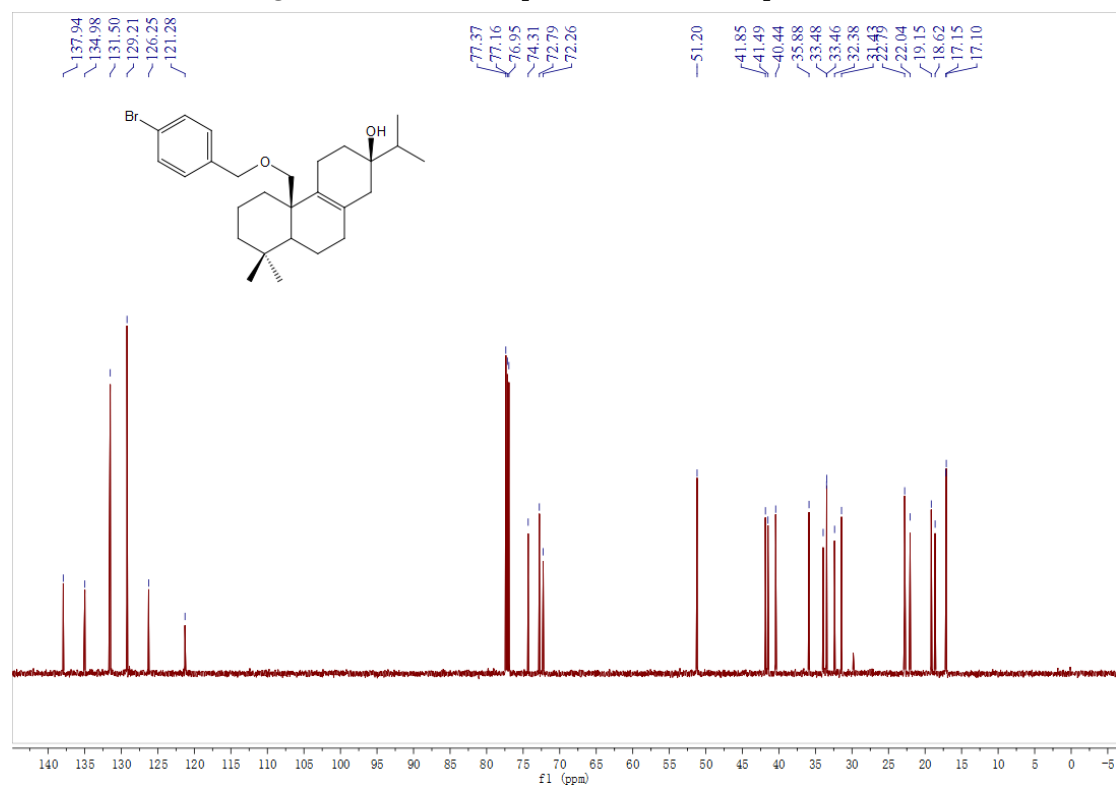

Figure S62. <sup>13</sup>C NMR spectrum of the compound 5f.

LW-63 #40 RT: 0.18 AV: 1 NL: 7.53E7  
T: FTMS + p ESI Full ms [120.0000-1600.0000]

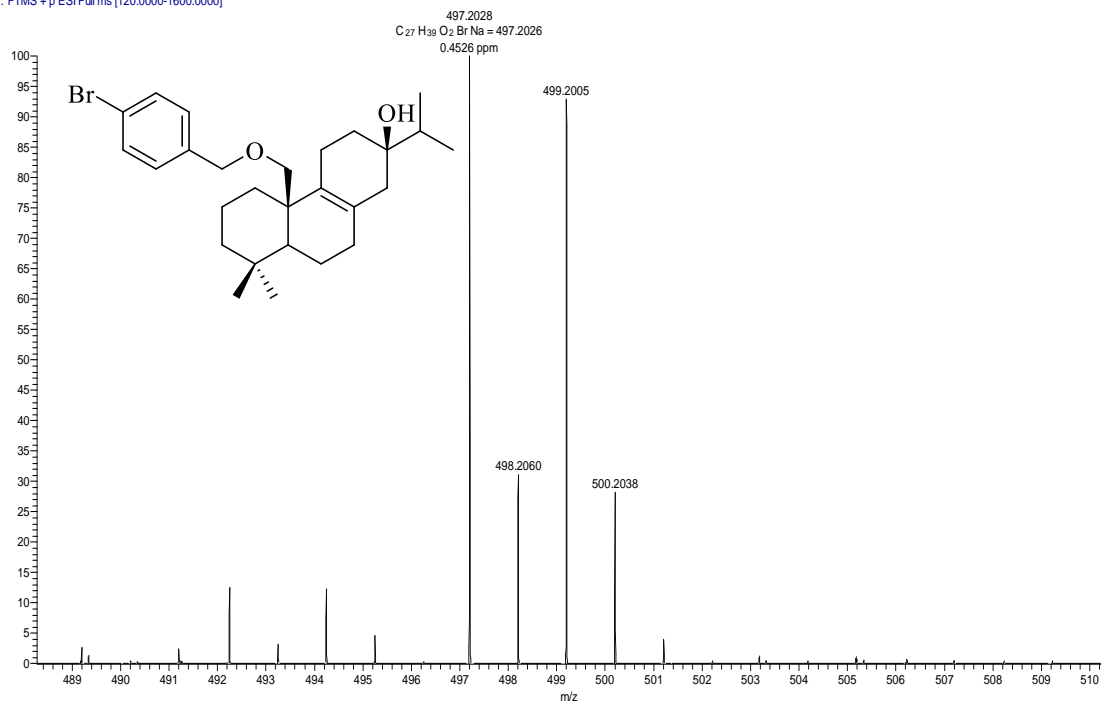

Figure S63. HRMS spectrum of the compound 5f.

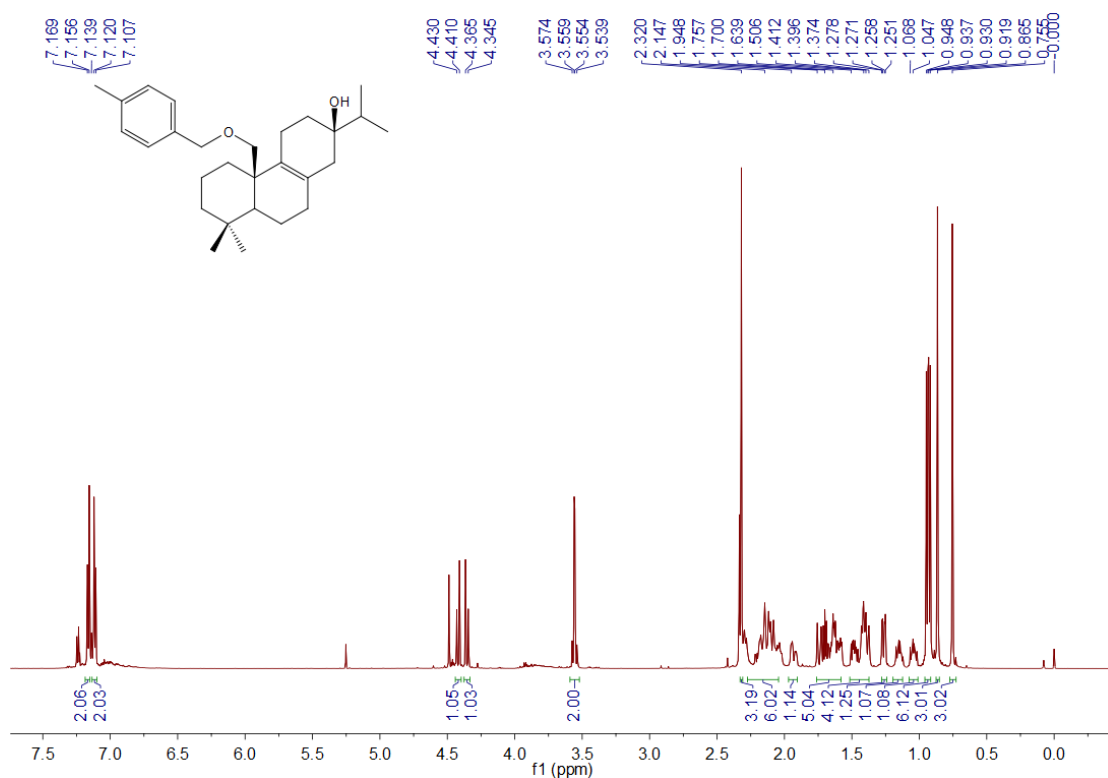

Figure S64. <sup>1</sup>H NMR spectrum of the compound 5g.

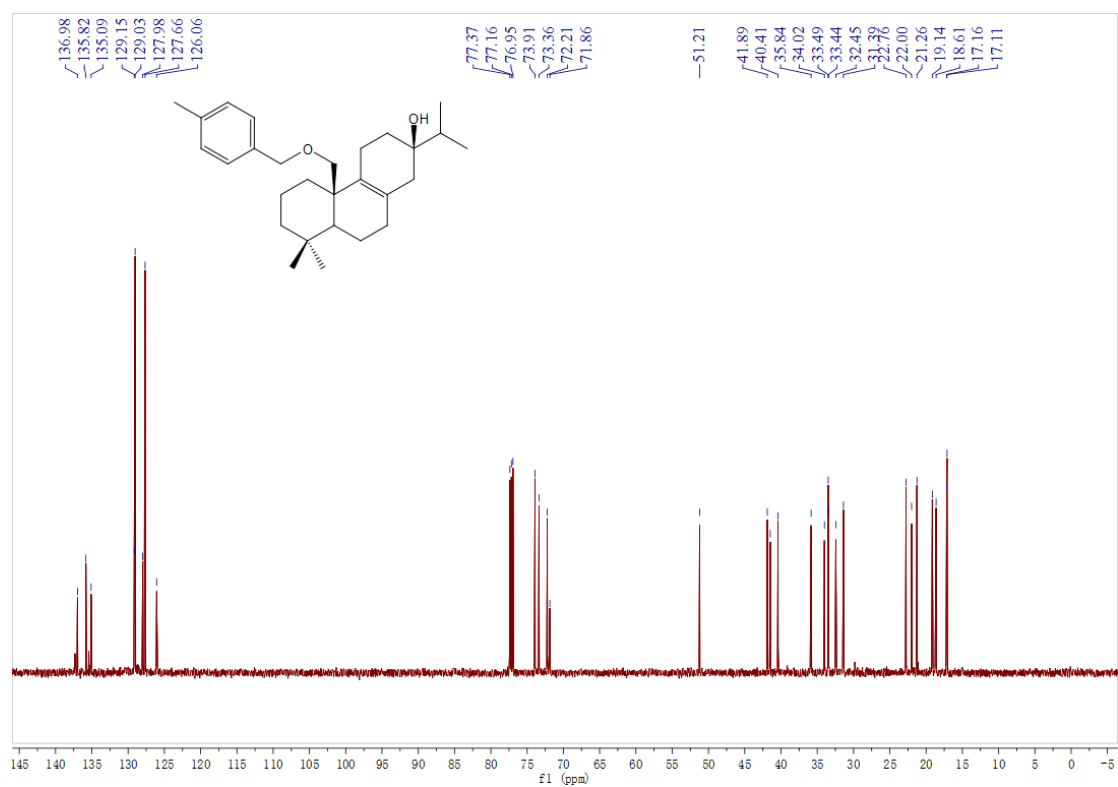

Figure S65. <sup>13</sup>C NMR spectrum of the compound 5g.

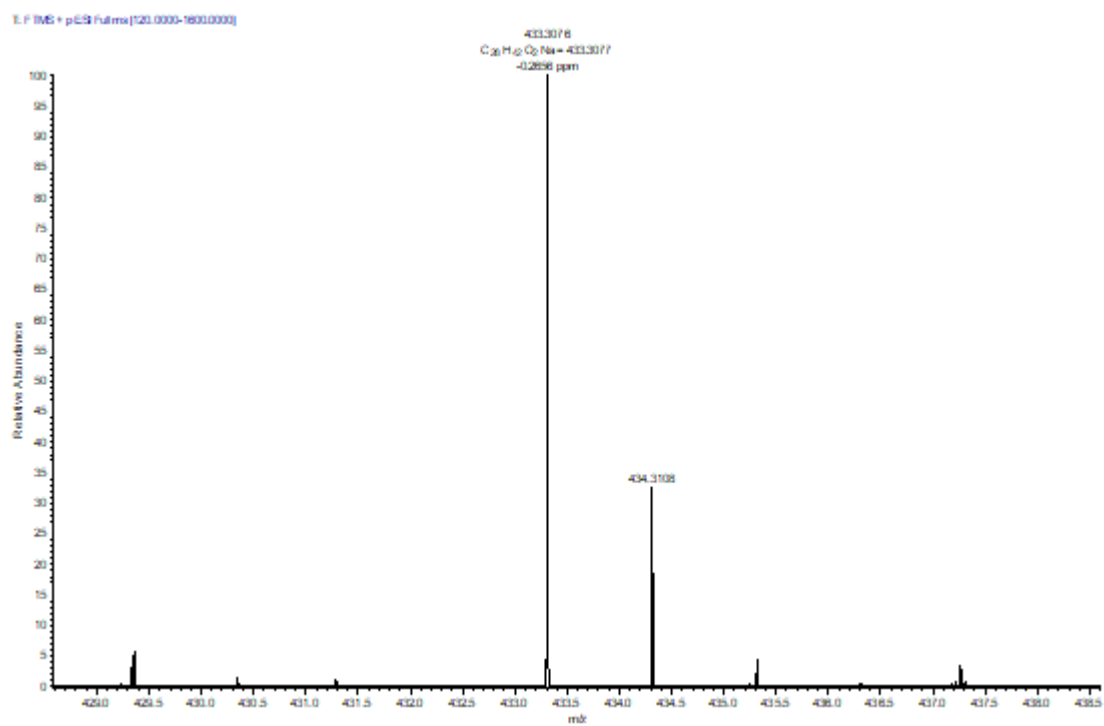

Figure S66. HRMS spectrum of the compound 5g.

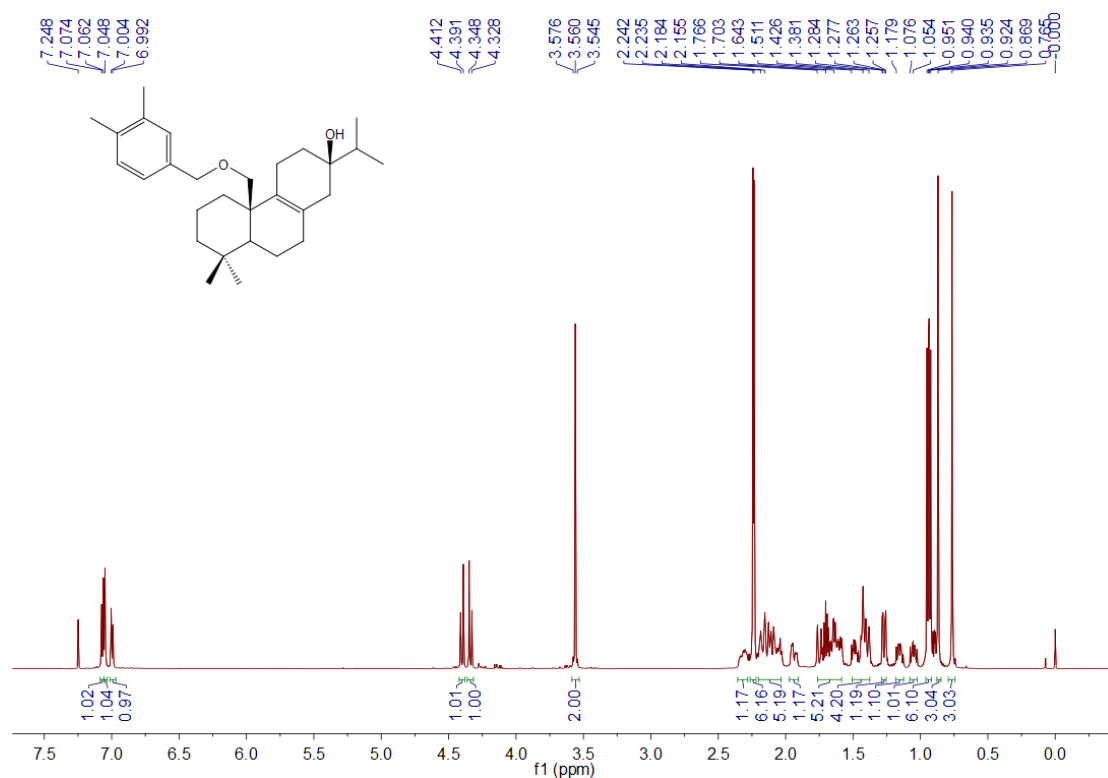

Figure S67. <sup>1</sup>H NMR spectrum of the compound 5h.

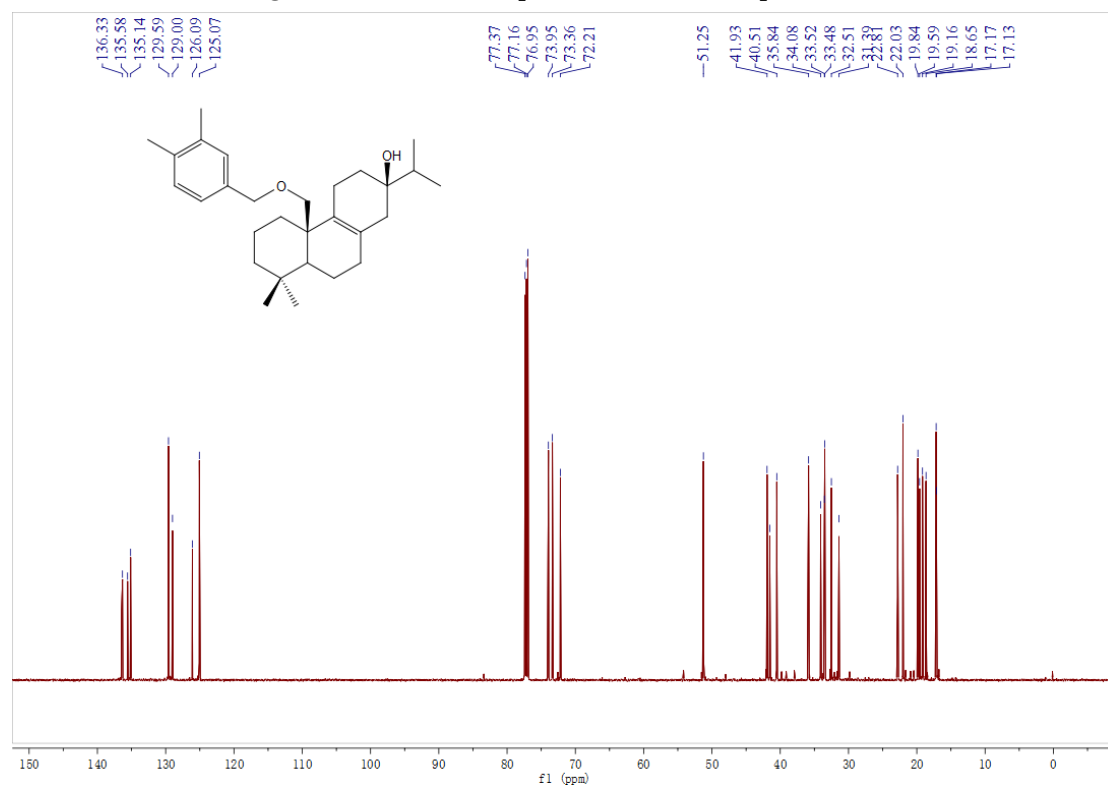

Figure S68. <sup>13</sup>C NMR spectrum of the compound 5h.

LW-67 #44 RT: 0.19 AV: 1 NL: 2.43E7  
T: FTMS +p ESI Full ms [120.0000-1600.0000]

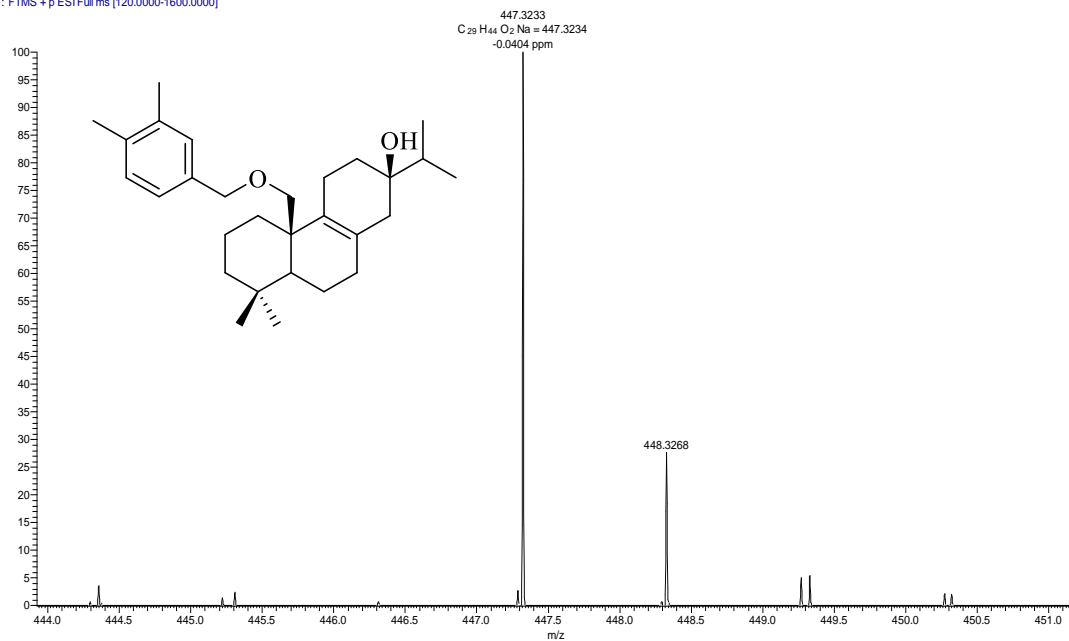

Figure S69. HRMS spectrum of the compound 5h.

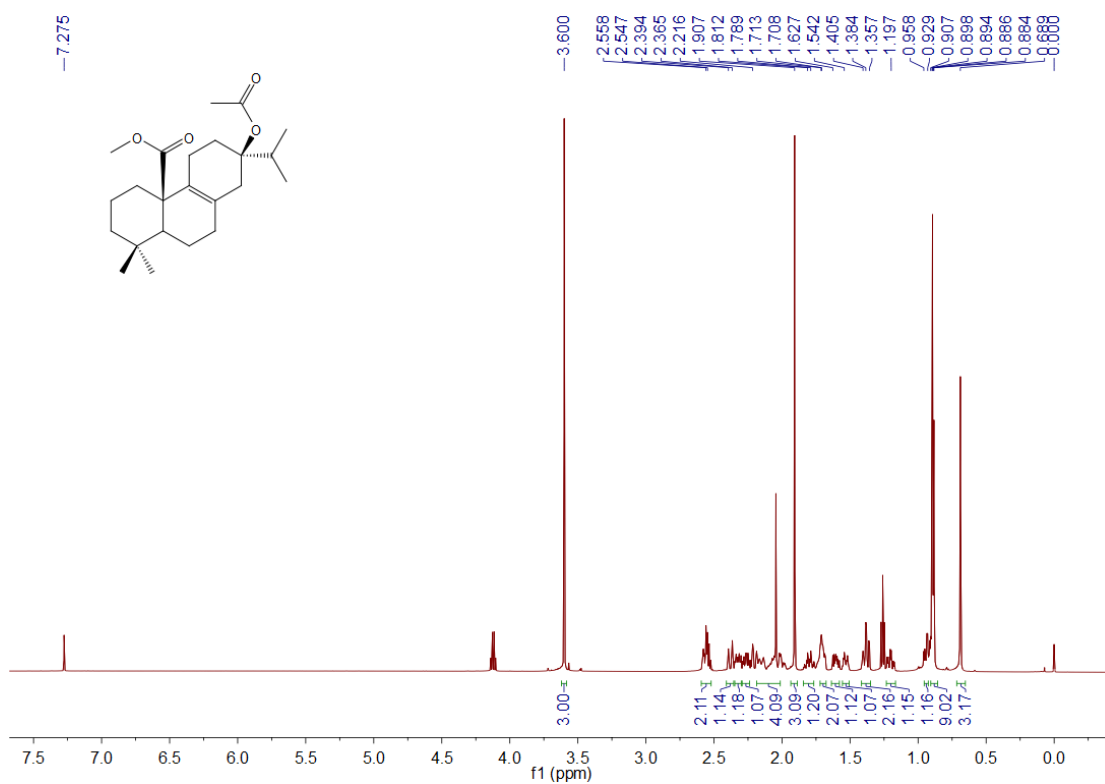

Figure S70. <sup>1</sup>H NMR spectrum of the compound 6a.



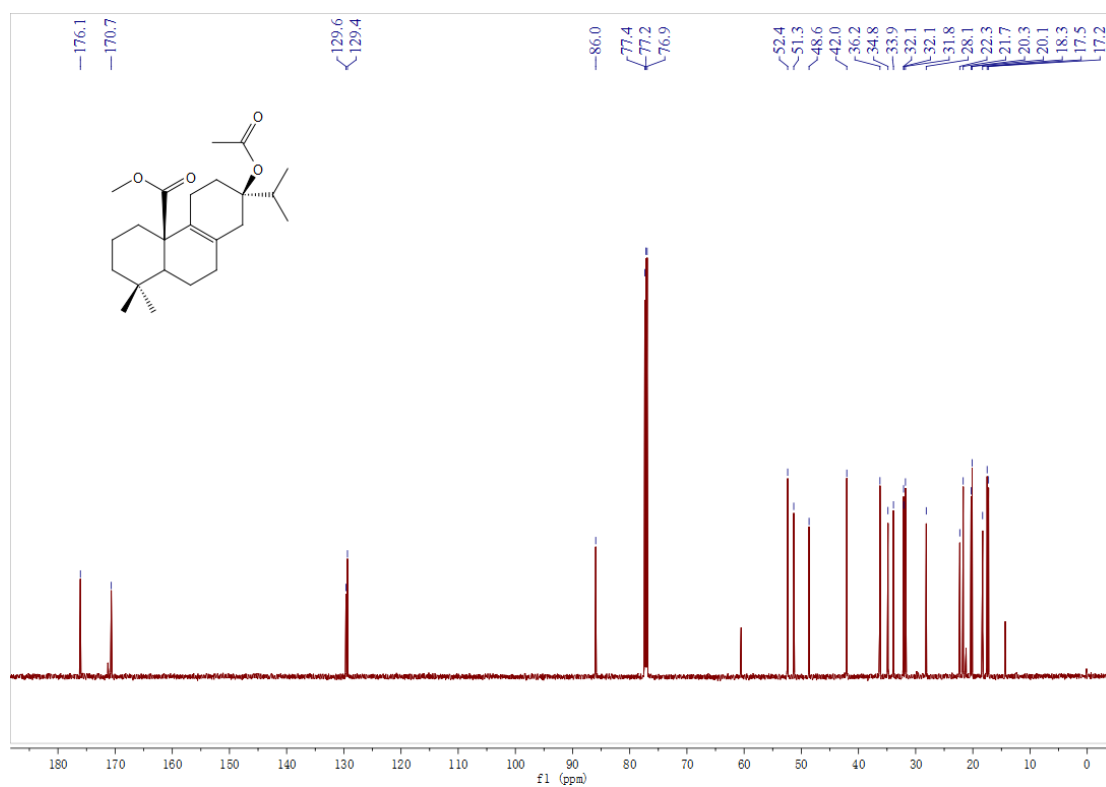

Figure S71. <sup>13</sup>C NMR spectrum of the compound 6a.

ZY-52B #42 RT: 0.18 AV: 1 NL: 8.39E8  
T: FTMS + p ESI Full ms [120.0000-1600.0000]

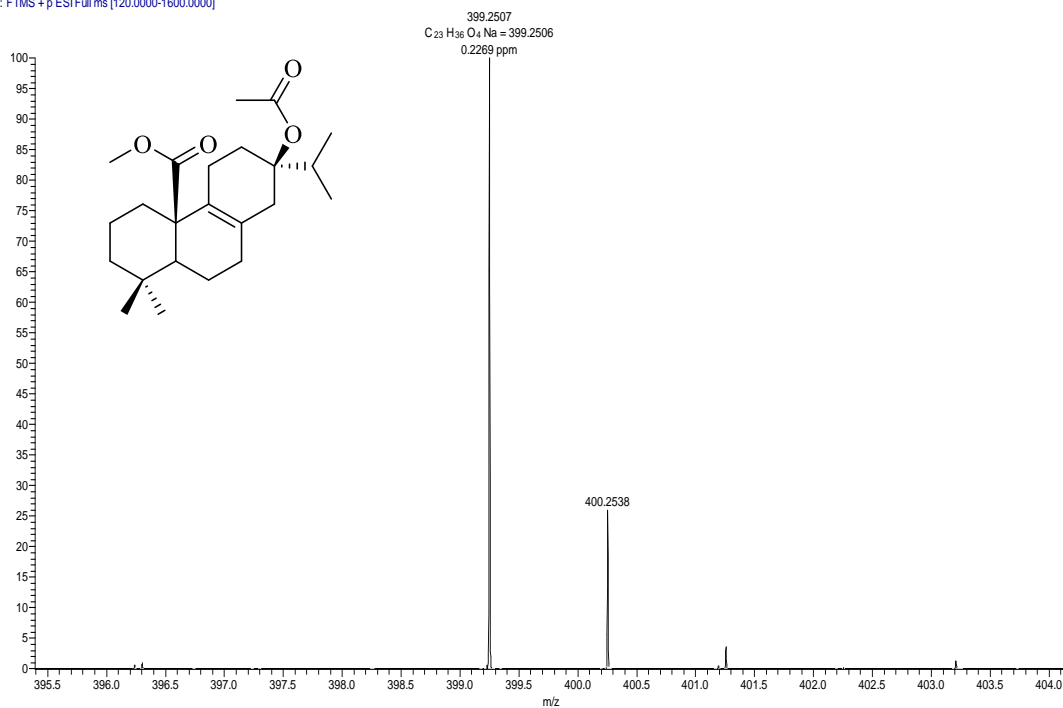

Figure S72. HRMS spectrum of the compound 6a.

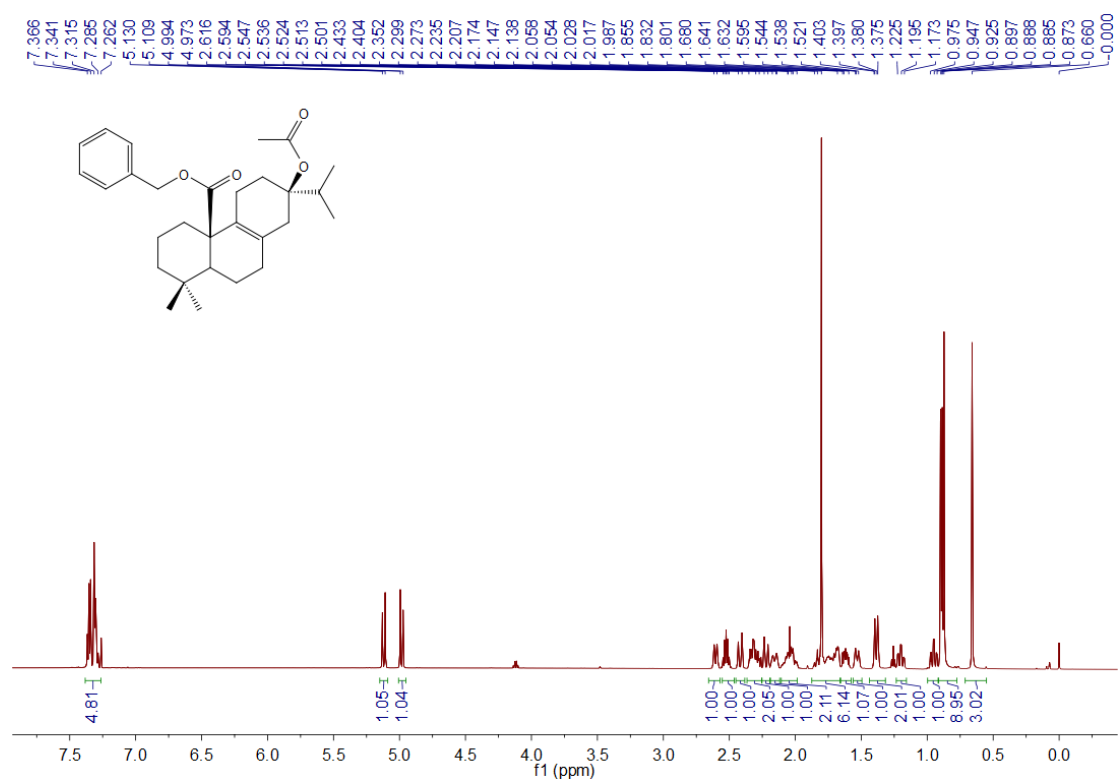

Figure S73.  $^1\text{H}$  NMR spectrum of the compound 6b.

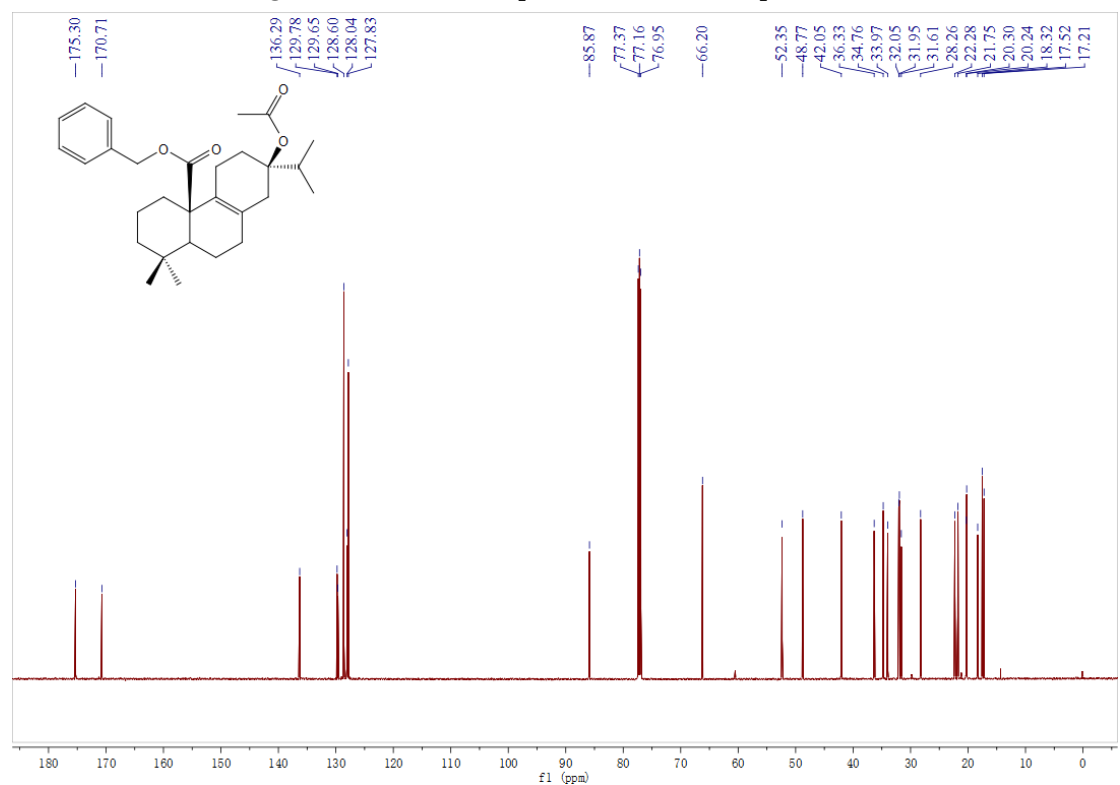

Figure S74.  $^{13}\text{C}$  NMR spectrum of the compound 6b.

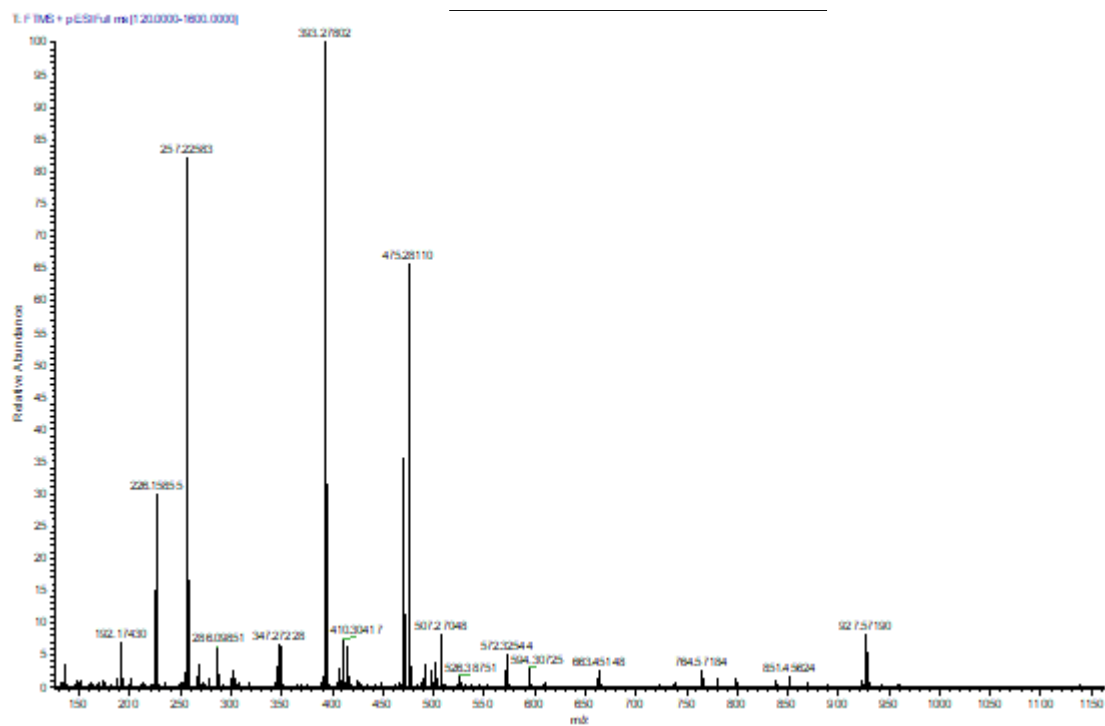

Figure S75. HRMS spectrum of the compound 6b.

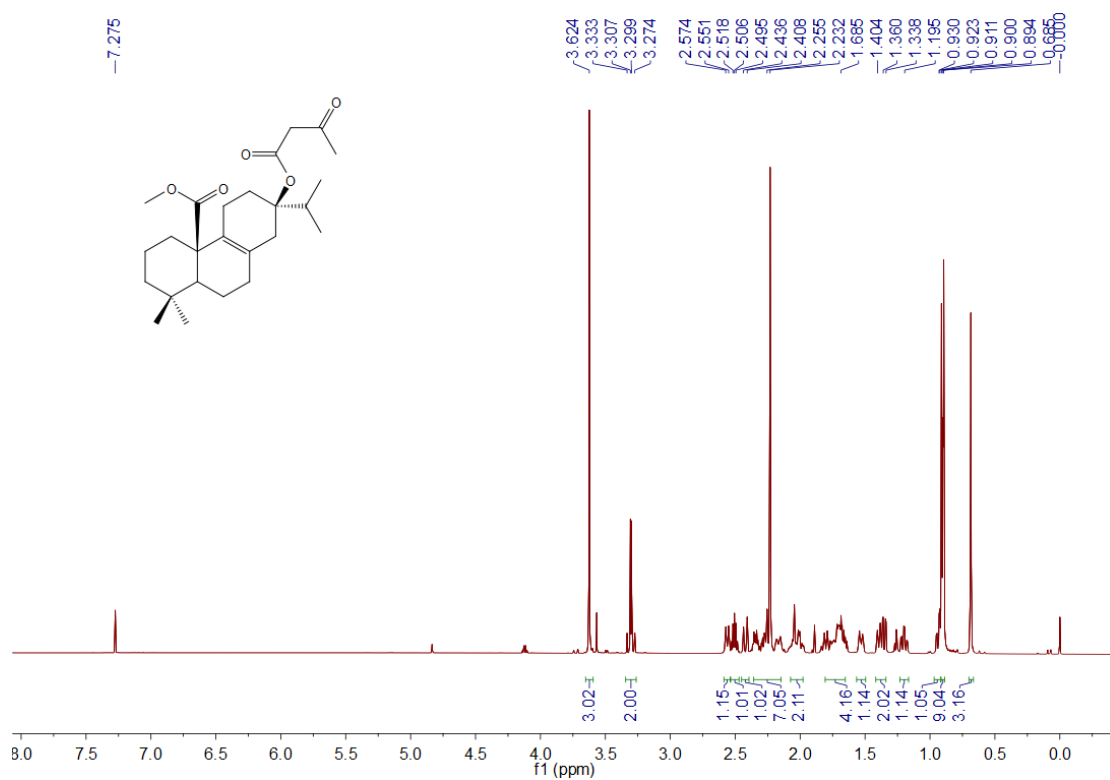

Figure S76. <sup>1</sup>H NMR spectrum of the compound 6c.

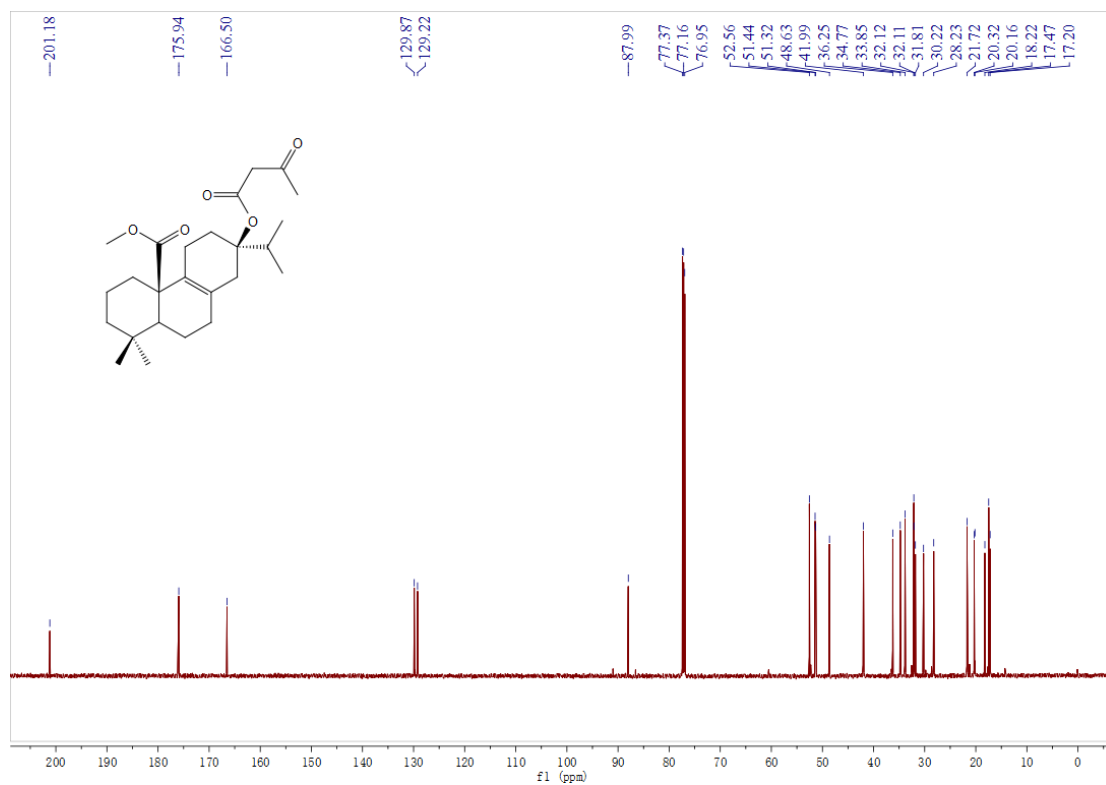

Figure S77. <sup>13</sup>C NMR spectrum of the compound 6c.

ZY-30d #41 RT: 0.18 AV: 1 NL: 3.33E8  
T: FTMS + p ESI Full ms [120.0000-1600.0000]

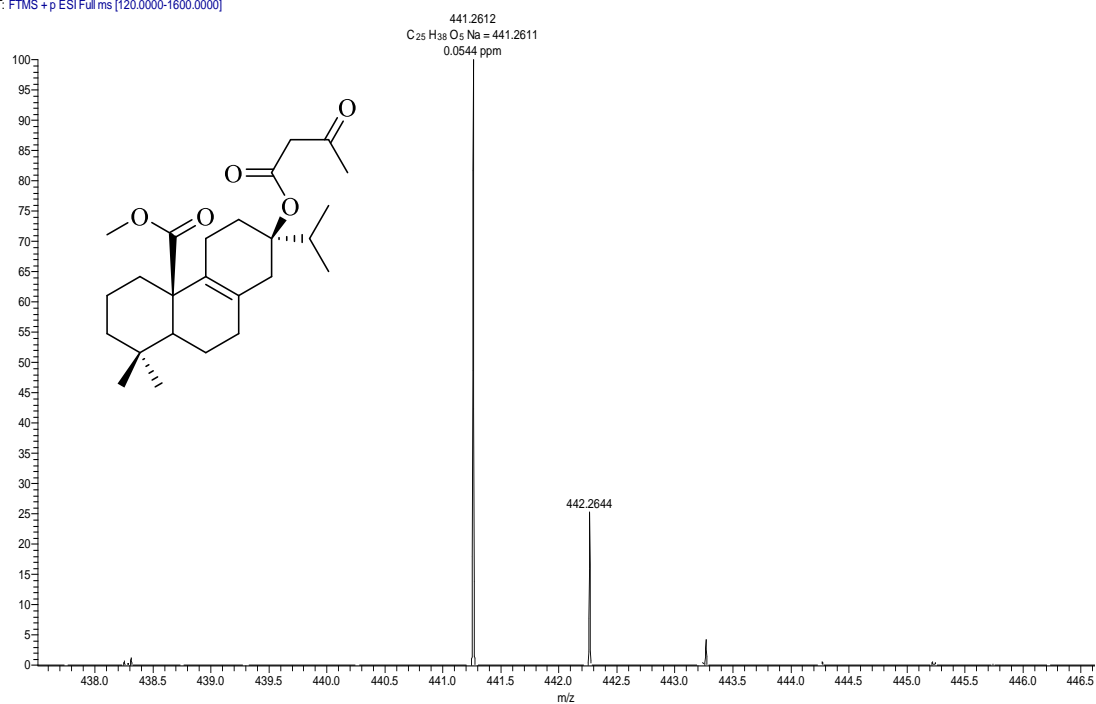

Figure S78. HRMS spectrum of the compound 6c.
